# Supplementary material for: Leveraging primate-specific genomic information for genetic studies of complex diseases
Source: Front Bioinform. 2023 Mar 28;3:1161167. doi: 10.3389/fbinf.2023.1161167 (PMC10086602; doi:10.3389/fbinf.2023.1161167)
Supplement: Supplementary file 1 [file Table1.XLSX]

## Sheet: TableS1
Table S1: List of 19,473 non-overlap PSI regions derived from PSI elements*
chr	start	end	region_PSItype	length
1	1015066	1015266	3	200
1	1590473	1590673	3	200
1	1986272	1990534	9	4262
1	2025794	2026186	6	392
1	2120861	2121064	3	203
1	2294490	2295016	7	526
1	2836802	2836824	1	22
1	2928620	2929080	8	460
1	3079423	3079808	6	385
1	3089754	3089889	12	135
1	3094403	3097374	9	2971
1	3253575	3255617	9	2042
1	3285380	3285535	8	155
1	3621452	3629885	9	8433
1	3750642	3753719	9	3077
1	3755973	3759012	9	3039
1	3785711	3787726	9	2015
1	3793809	3806082	9	12273
1	4271199	4271481	6	282
1	4324489	4329220	4	4731
1	4560082	4560401	6	319
1	4620606	4624889	9	4283
1	4726120	4726276	6	156
1	5236580	5238894	9	2314
1	5258760	5261604	4	2844
1	5397131	5399536	4	2405
1	5436643	5448013	9	11370
1	5524912	5525166	6	254
1	5659978	5660285	6	307
1	5726807	5729132	4	2325
1	5792566	5793451	6	885
1	6336418	6336624	3	206
1	6364454	6366304	6	1850
1	6774536	6776408	6	1872
1	7310705	7310825	1	120
1	7369351	7369668	6	317
1	7370662	7370790	6	128
1	7404594	7404794	3	200
1	7567630	7569785	9	2155
1	7651264	7651536	1	272
1	7923042	7923157	6	115
1	8012109	8013641	6	1532
1	8060033	8060380	1	347
1	8448378	8448693	6	315
1	8493613	8493930	6	317
1	8560453	8563204	6	2751
1	8572074	8572403	6	329
1	8590731	8591079	6	348
1	8972228	8972953	6	725
1	9634988	9635306	6	318
1	9683336	9683654	6	318
1	9735159	9735479	6	320
1	9889586	9891830	9	2244
1	9996849	10000648	9	3799
1	10013414	10016436	9	3022
1	10071753	10074028	9	2275
1	10082732	10085015	9	2283
1	10107013	10114765	9	7752
1	10259575	10259884	6	309
1	10412194	10412376	6	182
1	10588930	10589267	1	337
1	10597263	10599691	9	2428
1	10641774	10641856	6	82
1	10773091	10773533	12	442
1	10804424	10804788	6	364
1	11096279	11096619	6	340
1	11138318	11138624	6	306
1	11507933	11508064	1	131
1	11551895	11552212	6	317
1	11645194	11645259	6	65
1	11668719	11673458	9	4739
1	11891455	11893707	9	2252
1	11899456	11901910	9	2454
1	11941325	11941525	3	200
1	12001280	12001380	6	100
1	12051695	12052018	6	323
1	12102693	12103854	6	1161
1	12234205	12234317	6	112
1	12278238	12287657	9	9419
1	12310992	12311247	6	255
1	12421424	12421766	6	342
1	12586925	12589327	4	2402
1	13434893	13437399	9	2506
1	13754440	13758207	9	3767
1	13983865	13985728	6	1863
1	13999730	14000041	6	311
1	14258753	14259064	6	311
1	14268752	14269085	6	333
1	14327272	14327578	6	306
1	14583669	14584499	6	830
1	15055555	15055755	3	200
1	15402241	15411116	9	8875
1	15478024	15478224	3	200
1	15609253	15612359	4	3106
1	15733544	15748771	9	15227
1	16065307	16065508	3	201
1	17416159	17419808	9	3649
1	17705597	17705909	6	312
1	18070505	18072818	4	2313
1	18398155	18398472	6	317
1	19028686	19030779	4	2093
1	19252243	19252596	6	353
1	19315880	19322962	9	7082
1	19322988	19325982	9	2994
1	19668300	19668935	8	635
1	19672782	19672972	6	190
1	19688085	19688655	18	570
1	19834942	19835269	6	327
1	19915642	19917730	9	2088
1	20498236	20498556	6	320
1	20713360	20713539	1	179
1	20939092	20941584	4	2492
1	21141231	21143786	6	2555
1	21349695	21351407	6	1712
1	21379015	21380992	6	1977
1	21409233	21409562	6	329
1	21462385	21462690	6	305
1	21701019	21701147	6	128
1	21713451	21716310	6	2859
1	22146746	22147058	6	312
1	22284725	22290693	9	5968
1	22420790	22421101	6	311
1	22485980	22486121	6	141
1	23015533	23015706	6	173
1	23084404	23084723	6	319
1	23244249	23244449	3	200
1	23368934	23369244	6	310
1	23431455	23434262	9	2807
1	23546328	23546653	6	325
1	23583209	23584920	6	1711
1	23662329	23662635	6	306
1	23761019	23761114	1	95
1	23815355	23817420	9	2065
1	23829726	23831491	6	1765
1	23926441	23929853	9	3412
1	24014632	24016260	6	1628
1	24086023	24094099	9	8076
1	24108549	24118173	9	9624
1	24134375	24139115	9	4740
1	24178931	24180834	6	1903
1	24291784	24295425	9	3641
1	24319197	24321548	6	2351
1	24357748	24359397	6	1649
1	24621426	24621626	3	200
1	24710189	24710389	3	200
1	24958420	24958754	6	334
1	25001721	25002039	6	318
1	25125115	25127590	6	2475
1	25324689	25325018	6	329
1	25499550	25502800	4	3250
1	25660011	25662758	9	2747
1	25887868	25887885	1	17
1	25929713	25931465	6	1752
1	26216838	26217042	3	204
1	26303496	26303789	6	293
1	26677822	26680434	9	2612
1	26835360	26835686	6	326
1	26921842	26924010	6	2168
1	27118804	27118987	6	183
1	27129378	27131429	6	2051
1	27143722	27145844	6	2122
1	27200228	27200561	6	333
1	27309617	27309945	1	328
1	27389912	27392080	6	2168
1	27483114	27483288	6	174
1	27572366	27572545	6	179
1	27643336	27648971	9	5635
1	27767971	27768270	6	299
1	27776868	27782223	9	5355
1	27797560	27797875	6	315
1	27969013	27969340	6	327
1	28421541	28422959	6	1418
1	28450501	28450816	6	315
1	28579411	28579728	6	317
1	28621555	28621751	6	196
1	28706565	28706880	6	315
1	28870541	28870856	6	315
1	28931703	28931903	3	200
1	29022167	29022490	6	323
1	29139636	29139836	3	200
1	29301011	29301211	3	200
1	29312324	29312691	6	367
1	29501924	29502239	6	315
1	29845199	29849060	4	3861
1	30129793	30130593	6	800
1	30154546	30157496	4	2950
1	30184100	30184416	6	316
1	30220675	30223460	4	2785
1	30644209	30644410	3	201
1	30822827	30822972	1	145
1	30911208	30917016	6	5808
1	30966232	30972736	6	6504
1	31040659	31041674	6	1015
1	31107548	31109913	4	2365
1	31169521	31169656	6	135
1	31337069	31340243	9	3174
1	31445129	31445319	6	190
1	31450095	31452216	9	2121
1	31458880	31461005	9	2125
1	31506222	31506382	6	160
1	31574198	31577815	9	3617
1	31648583	31650494	6	1911
1	31904625	31904949	6	324
1	31954523	31957142	4	2619
1	32023527	32023866	6	339
1	32307599	32307906	6	307
1	32388915	32389231	6	316
1	32473347	32476571	9	3224
1	32544371	32547990	9	3619
1	32607344	32610434	9	3090
1	32697399	32717150	9	19751
1	32870966	32871277	6	311
1	33108604	33112242	9	3638
1	33192588	33192904	6	316
1	33267528	33267849	6	321
1	33439030	33441520	6	2490
1	33465385	33465695	6	310
1	33516549	33519095	6	2546
1	33530325	33532590	9	2265
1	34009691	34010017	6	326
1	34542784	34543080	6	296
1	34557980	34564061	6	6081
1	34973110	34973416	6	306
1	35031651	35037707	6	6056
1	35087404	35087631	1	227
1	35152972	35155032	4	2060
1	35358475	35358796	6	321
1	35432666	35433933	6	1267
1	35445637	35445969	6	332
1	35724433	35724737	6	304
1	35749556	35749876	6	320
1	35895535	35895848	6	313
1	35899677	35899988	6	311
1	35950368	35950602	6	234
1	36708738	36709684	6	946
1	37097856	37098237	6	381
1	37255312	37262151	9	6839
1	37323436	37323636	3	200
1	37392819	37393061	1	242
1	37476318	37476643	6	325
1	37545261	37547945	6	2684
1	38260148	38263859	9	3711
1	38374112	38374269	6	157
1	38407315	38407647	6	332
1	38445273	38445621	1	348
1	38454639	38454995	1	356
1	38490057	38490379	6	322
1	38549841	38552345	9	2504
1	38687906	38688256	1	350
1	38794743	38795059	6	316
1	39112362	39114013	6	1651
1	39114092	39114292	3	200
1	39135448	39138782	4	3334
1	39336171	39336496	6	325
1	39370408	39370717	6	309
1	39535113	39537654	9	2541
1	39690873	39691192	6	319
1	39699437	39701101	6	1664
1	39712724	39712895	6	171
1	39730327	39730646	6	319
1	40063555	40063674	6	119
1	40072109	40072403	6	294
1	40378113	40379784	6	1671
1	40447766	40459023	9	11257
1	40488010	40488342	6	332
1	40634993	40635316	6	323
1	40744007	40744269	6	262
1	40831174	40836549	6	5375
1	40887095	40887295	3	200
1	40959924	40960240	6	316
1	41150950	41151073	6	123
1	41203567	41203874	6	307
1	41408370	41410913	9	2543
1	41422693	41427112	9	4419
1	41596235	41596667	7	432
1	41673436	41674126	6	690
1	41720483	41720806	6	323
1	42166820	42167010	8	190
1	42320182	42321233	6	1051
1	42681894	42682198	6	304
1	42849908	42853462	9	3554
1	42907282	42907591	6	309
1	43008201	43008524	6	323
1	43216209	43217293	6	1084
1	43252976	43253305	6	329
1	43259581	43259781	3	200
1	43279007	43279219	1	212
1	43957986	43960106	9	2120
1	43966864	43968660	6	1796
1	44352663	44356863	9	4200
1	44485147	44485404	1	257
1	44739747	44740177	1	430
1	44845414	44845607	6	193
1	44886552	44889808	9	3256
1	44902152	44902427	1	275
1	44989764	44991209	5	1445
1	45097595	45097759	1	164
1	45341399	45342889	6	1490
1	45403260	45403591	6	331
1	45417623	45417935	6	312
1	45450457	45450778	6	321
1	45546895	45548021	6	1126
1	45688643	45689568	6	925
1	45963177	45964086	6	909
1	46043269	46043595	6	326
1	46063631	46064616	7	985
1	46189626	46191790	6	2164
1	46215145	46215493	6	348
1	46567641	46567957	6	316
1	46776452	46776776	6	324
1	46802670	46802960	6	290
1	46803333	46803625	6	292
1	47040703	47041712	5	1009
1	47041775	47041795	1	20
1	47239576	47239892	6	316
1	47273832	47274870	6	1038
1	47416022	47416332	6	310
1	48058655	48061777	9	3122
1	48080009	48080330	6	321
1	48138695	48140818	9	2123
1	48144384	48147673	9	3289
1	48180470	48180671	3	201
1	48339933	48340256	6	323
1	48370163	48370236	6	73
1	48498219	48503737	4	5518
1	48615794	48621843	6	6049
1	48657367	48659001	6	1634
1	48661862	48662030	6	168
1	48847323	48850108	6	2785
1	48944336	48945970	6	1634
1	48965147	48965550	1	403
1	49082760	49082910	8	150
1	49097483	49097535	6	52
1	49353755	49353972	1	217
1	49481951	49482115	1	164
1	49625603	49627780	4	2177
1	49815860	49816186	6	326
1	50088016	50088345	6	329
1	50219942	50220061	6	119
1	50444851	50445164	6	313
1	50468022	50468342	6	320
1	50477548	50477868	6	320
1	50846512	50848255	6	1743
1	51078130	51078331	1	201
1	51159688	51159753	6	65
1	51162457	51162883	1	426
1	51383834	51384643	6	809
1	51666045	51666379	6	334
1	51911123	51911323	3	200
1	51973853	51974027	6	174
1	52176704	52178129	6	1425
1	52384644	52384967	6	323
1	52471904	52472893	6	989
1	53069574	53073855	9	4281
1	53218287	53223391	9	5104
1	53305336	53305643	6	307
1	53749128	53749974	6	846
1	53793546	53793584	1	38
1	53992519	53992568	12	49
1	54178862	54179135	6	273
1	54271462	54271766	6	304
1	54274990	54277585	9	2595
1	54333038	54333347	6	309
1	54482894	54486587	9	3693
1	54491540	54491881	6	341
1	54513385	54517518	9	4133
1	54521282	54525472	9	4190
1	54698259	54700072	6	1813
1	54725380	54725670	8	290
1	54782019	54782379	6	360
1	54906341	54906667	6	326
1	55026745	55028820	6	2075
1	55052285	55057930	9	5645
1	55092101	55094796	9	2695
1	55287561	55287879	6	318
1	55580908	55581196	6	288
1	55583118	55583446	6	328
1	56204189	56204491	1	302
1	56273303	56273623	6	320
1	56789791	56789809	1	18
1	56954830	56960223	9	5393
1	57184940	57185130	8	190
1	57647053	57647234	1	181
1	57673118	57673429	6	311
1	57698929	57699124	6	195
1	57719454	57719857	1	403
1	57892536	57892841	6	305
1	57945541	57945849	6	308
1	58066513	58066615	1	102
1	58069320	58069593	1	273
1	58124925	58125112	1	187
1	58464626	58464640	1	14
1	58551617	58551935	6	318
1	58580621	58581733	6	1112
1	58592118	58598173	6	6055
1	58720052	58720992	6	940
1	58777119	58780348	4	3229
1	58868480	58868680	3	200
1	58927783	58928068	6	285
1	58938931	58939268	6	337
1	59225892	59226195	6	303
1	59354094	59354431	6	337
1	59754483	59754816	6	333
1	59774473	59777298	4	2825
1	59789942	59790260	6	318
1	59982927	59983209	6	282
1	60084080	60086102	4	2022
1	60113416	60119464	6	6048
1	60468065	60469181	6	1116
1	60551356	60551489	6	133
1	60673747	60676485	6	2738
1	60716405	60716713	6	308
1	60744055	60745154	6	1099
1	60754937	60755257	6	320
1	60848608	60848986	6	378
1	60870657	60870971	6	314
1	61449355	61449489	1	134
1	61621052	61621367	6	315
1	61637623	61637898	1	275
1	61710908	61711108	1	200
1	61762704	61763185	1	481
1	61907580	61907780	3	200
1	61989781	61990098	1	317
1	62033323	62033635	6	312
1	62034596	62037265	4	2669
1	62064495	62064813	6	318
1	62179556	62179882	6	326
1	62334773	62335051	6	278
1	62649216	62649416	3	200
1	63047926	63048258	6	332
1	63153741	63158616	9	4875
1	63217316	63217446	6	130
1	63339681	63339996	6	315
1	63464549	63465539	1	990
1	63510499	63510813	6	314
1	63511524	63511692	6	168
1	63524449	63524771	6	322
1	63553532	63553789	1	257
1	63571420	63578769	9	7349
1	63610841	63612903	9	2062
1	63938102	63940621	6	2519
1	64254385	64254693	1	308
1	64297272	64297472	3	200
1	64372906	64375851	9	2945
1	64378665	64387707	9	9042
1	64433869	64436222	4	2353
1	64590698	64591196	1	498
1	64619945	64622254	4	2309
1	64666100	64667995	6	1895
1	64781537	64783774	9	2237
1	64828106	64830202	4	2096
1	64879850	64882794	6	2944
1	64893440	64896258	9	2818
1	64897112	64897434	6	322
1	64943272	64943628	6	356
1	65015854	65016150	1	296
1	65176584	65176895	6	311
1	65263591	65264235	6	644
1	65279557	65279609	6	52
1	65304544	65304857	6	313
1	65495869	65500645	9	4776
1	65537330	65537644	6	314
1	65543192	65543318	1	126
1	65652758	65653063	6	305
1	65768207	65768532	6	325
1	66095881	66096114	6	233
1	66243728	66244535	6	807
1	66386642	66386963	6	321
1	66389767	66390069	6	302
1	66595057	66595399	6	342
1	66662297	66662637	6	340
1	66804418	66804735	6	317
1	66890497	66891462	6	965
1	66892686	66893013	6	327
1	67208143	67208466	6	323
1	67290852	67291177	6	325
1	67358605	67358796	6	191
1	67544569	67550613	6	6044
1	67624644	67624958	6	314
1	67827966	67828282	6	316
1	68175522	68175938	6	416
1	68314510	68317445	4	2935
1	68970843	68971166	6	323
1	69129851	69129973	6	122
1	69389168	69395209	6	6041
1	69429471	69429813	6	342
1	69676186	69676515	6	329
1	69677875	69678209	6	334
1	69731469	69731788	6	319
1	69927709	69928025	6	316
1	70080277	70080410	1	133
1	70125338	70129716	46	4378
1	70591192	70591497	6	305
1	71077884	71078074	6	190
1	71184680	71185270	8	590
1	71511690	71511990	6	300
1	71608502	71611807	9	3305
1	71650877	71653733	9	2856
1	71662614	71663043	1	429
1	71836948	71837261	6	313
1	71842002	71842202	3	200
1	71854613	71854920	6	307
1	71979380	71985457	6	6077
1	72067922	72068248	6	326
1	72074913	72075251	6	338
1	72215674	72215989	6	315
1	72253981	72254260	1	279
1	72353885	72359947	6	6062
1	72491511	72491835	6	324
1	72722722	72723038	6	316
1	72879558	72879884	1	326
1	73893835	73906395	9	12560
1	73999319	74005628	9	6309
1	74361724	74361861	1	137
1	74405507	74405689	6	182
1	74534555	74534670	1	115
1	74720794	74721067	6	273
1	74774769	74775073	6	304
1	74857646	74857778	6	132
1	74966041	74966354	6	313
1	75120005	75120098	6	93
1	75160269	75160478	1	209
1	75213019	75213352	6	333
1	75376973	75377151	1	178
1	75745810	75746126	6	316
1	75772420	75772735	6	315
1	76425037	76425339	6	302
1	76529679	76529879	3	200
1	76577110	76579062	6	1952
1	76605840	76605861	1	21
1	76927477	76935092	9	7615
1	76999496	77004497	9	5001
1	77034610	77034811	3	201
1	77164693	77165008	6	315
1	77562566	77562835	6	269
1	77601931	77602257	6	326
1	77861083	77861283	3	200
1	78273813	78273906	6	93
1	78275442	78277633	6	2191
1	78334604	78336839	6	2235
1	78457815	78458136	6	321
1	78543589	78543906	6	317
1	79304119	79304450	6	331
1	79311098	79317167	6	6069
1	79486285	79486624	1	339
1	79596506	79596816	6	310
1	79659180	79659440	8	260
1	79719941	79720255	6	314
1	79722521	79722847	6	326
1	79757839	79757959	1	120
1	80404057	80410143	6	6086
1	80479311	80479626	6	315
1	80690295	80690607	6	312
1	80794922	80795122	6	200
1	80796565	80796935	6	370
1	80919103	80919231	1	128
1	81011420	81011570	8	150
1	81089123	81089790	6	667
1	81139876	81140076	3	200
1	81283699	81283902	1	203
1	81373873	81373993	1	120
1	81387192	81387516	6	324
1	81494086	81494421	1	335
1	81623752	81623890	1	138
1	81642699	81643017	6	318
1	81669024	81669153	1	129
1	81766157	81766479	6	322
1	81967267	81971458	6	4191
1	82064452	82064819	1	367
1	82474655	82474970	6	315
1	82497621	82497755	1	134
1	82569760	82570573	6	813
1	82882026	82882357	6	331
1	83013062	83013384	6	322
1	83220917	83221206	1	289
1	83226006	83228847	9	2841
1	83230989	83231018	1	29
1	83231086	83231270	1	184
1	83415141	83418177	4	3036
1	83451695	83451955	1	260
1	83871362	83871911	1	549
1	83969385	83969759	1	374
1	84018958	84019371	6	413
1	84078697	84078897	3	200
1	84211470	84211971	1	501
1	84455843	84456158	6	315
1	84854023	84857191	9	3168
1	85023975	85024274	6	299
1	85040012	85040217	3	205
1	85288413	85291671	4	3258
1	85294189	85294389	3	200
1	85384728	85387683	4	2955
1	85459293	85459613	6	320
1	85599010	85601695	4	2685
1	85944834	85945156	6	322
1	86079706	86084693	9	4987
1	86214189	86220248	6	6059
1	86279204	86279533	6	329
1	86680728	86683027	6	2299
1	86738310	86738638	6	328
1	86809894	86810206	6	312
1	86882432	86882753	6	321
1	86952858	86953058	3	200
1	86995211	86995623	6	412
1	87010976	87016107	4	5131
1	87016293	87020068	4	3775
1	87198821	87199021	3	200
1	87364430	87366387	6	1957
1	87568855	87569055	3	200
1	87641203	87641507	6	304
1	87718160	87718481	83	321
1	87738579	87738901	6	322
1	87795132	87796797	5	1665
1	87835463	87835856	18	393
1	87837543	87837831	6	288
1	87923445	87923763	6	318
1	88075879	88076121	1	242
1	88261640	88261890	8	250
1	88285958	88286718	1	760
1	88336273	88336621	6	348
1	88354617	88354930	6	313
1	88360815	88361126	6	311
1	88393079	88393389	18	310
1	88536746	88536889	1	143
1	88615792	88616583	1	791
1	88624258	88624624	1	366
1	88645430	88645630	1	200
1	88807508	88813575	6	6067
1	88927378	88928363	1	985
1	88952731	88952922	1	191
1	89236262	89236569	6	307
1	89490815	89492864	9	2049
1	89532541	89533507	6	966
1	89648156	89648444	6	288
1	89854106	89855725	6	1619
1	89974183	89974454	6	271
1	90006986	90007317	6	331
1	90025945	90027456	6	1511
1	90150645	90150974	6	329
1	90187509	90187842	6	333
1	90228438	90228639	3	201
1	90567852	90568052	3	200
1	90611914	90612235	6	321
1	90697852	90698180	6	328
1	90847520	90848241	5	721
1	91151361	91151672	6	311
1	91286398	91286754	18	356
1	91305562	91307215	2	1653
1	91356705	91359566	6	2861
1	91729915	91730223	6	308
1	91809797	91812107	4	2310
1	91852775	91853537	6	762
1	91934268	91934468	6	200
1	92029760	92031880	4	2120
1	92389047	92389369	6	322
1	92460128	92460447	6	319
1	92483730	92486740	9	3010
1	92589232	92589352	6	120
1	93117116	93117426	6	310
1	93237802	93238029	6	227
1	93502753	93503146	6	393
1	93742332	93743306	6	974
1	93843835	93846595	9	2760
1	94256158	94262238	6	6080
1	94616164	94616461	6	297
1	94661802	94662116	6	314
1	94918863	94919174	6	311
1	95041888	95042212	6	324
1	95732748	95732962	1	214
1	95746874	95747329	1	455
1	95806901	95807307	1	406
1	95817252	95817345	6	93
1	95986393	95986712	6	319
1	96035470	96035782	6	312
1	96253951	96254132	6	181
1	96399440	96399879	1	439
1	96407876	96407933	6	57
1	96577408	96577716	6	308
1	96934643	96936247	6	1604
1	96945237	96945536	6	299
1	96960769	96961029	1	260
1	97069930	97075957	6	6027
1	97144326	97145198	6	872
1	97227273	97229189	6	1916
1	97267473	97267789	6	316
1	97391566	97392094	1	528
1	97463380	97463624	81	244
1	97668988	97669243	6	255
1	97783495	97787841	6	4346
1	97943147	97943450	6	303
1	98151896	98152218	6	322
1	98304103	98304425	6	322
1	98408181	98410364	4	2183
1	98623229	98623400	1	171
1	98760223	98760537	6	314
1	98782868	98783189	6	321
1	98843082	98843134	6	52
1	98977327	98979233	6	1906
1	99138183	99138507	6	324
1	99624650	99624750	6	100
1	99678980	99679760	6	780
1	99720630	99720943	6	313
1	99843737	99844045	6	308
1	99854074	99856449	6	2375
1	100298821	100299133	6	312
1	100532250	100532564	6	314
1	100586312	100586624	6	312
1	100636194	100636827	7	633
1	100646181	100646499	6	318
1	100647060	100647355	6	295
1	100991223	100991526	6	303
1	101205900	101206412	7	512
1	101490453	101490621	1	168
1	101490800	101491270	8	470
1	101544928	101545128	3	200
1	101581029	101581295	6	266
1	101620918	101621057	1	139
1	102133323	102133549	1	226
1	102251804	102252856	6	1052
1	102540132	102540261	1	129
1	102689424	102689737	6	313
1	102695650	102695963	6	313
1	102696339	102697069	6	730
1	102779759	102780221	6	462
1	102945513	102945830	6	317
1	102976548	102978169	6	1621
1	103007707	103008030	6	323
1	103184581	103184646	6	65
1	103325953	103326277	6	324
1	103345220	103345450	8	230
1	103593417	103593732	6	315
1	103635867	103636191	6	324
1	103644665	103644983	6	318
1	103743186	103743503	6	317
1	103747360	103747652	6	292
1	104121434	104121577	6	143
1	104474036	104474361	6	325
1	104577893	104579401	6	1508
1	104704285	104704440	6	155
1	104719848	104720165	6	317
1	104820733	104820841	1	108
1	105180209	105180409	3	200
1	105182746	105183050	6	304
1	105312815	105318910	6	6095
1	105386451	105392501	6	6050
1	105537114	105537278	1	164
1	105724149	105724380	6	231
1	105756526	105759049	6	2523
1	106134928	106135276	6	348
1	106138496	106138818	6	322
1	106150716	106150772	6	56
1	106201384	106203613	6	2229
1	106276674	106276992	6	318
1	106560151	106560457	6	306
1	106826916	106827737	6	821
1	106895326	106895640	1	314
1	106935124	106935443	6	319
1	106954434	106956024	6	1590
1	107161468	107165056	4	3588
1	107219174	107219474	1	300
1	107291285	107291490	8	205
1	107292620	107292910	8	290
1	107535101	107535399	6	298
1	108225700	108226070	8	370
1	108465292	108465612	6	320
1	108535732	108536062	6	330
1	108702094	108703636	6	1542
1	108760345	108765973	9	5628
1	109078090	109079571	6	1481
1	109118930	109122294	6	3364
1	109203264	109203578	6	314
1	109217666	109219452	6	1786
1	109260560	109260850	8	290
1	109474416	109474494	6	78
1	109623928	109624251	6	323
1	109847089	109847273	6	184
1	110196789	110196932	6	143
1	110206131	110209679	9	3548
1	110568651	110568973	6	322
1	110828388	110828640	6	252
1	111000663	111001011	6	348
1	111481729	111482023	6	294
1	111585336	111585486	6	150
1	111611192	111611478	6	286
1	111701524	111701850	6	326
1	111772022	111772336	6	314
1	111776171	111776844	6	673
1	112056258	112056458	3	200
1	112149623	112151533	6	1910
1	112302313	112302629	6	316
1	112514791	112515108	6	317
1	112565393	112565712	6	319
1	112694842	112694996	6	154
1	112764040	112770080	6	6040
1	113182379	113183879	6	1500
1	113265359	113265559	3	200
1	113267055	113268043	6	988
1	113331602	113335414	9	3812
1	113337926	113340991	9	3065
1	113350659	113354451	9	3792
1	113440179	113442072	6	1893
1	113733130	113735135	4	2005
1	113811840	113811990	8	150
1	113926768	113927084	6	316
1	113958618	113959113	6	495
1	114051976	114052627	6	651
1	114211173	114211506	6	333
1	114255399	114255694	6	295
1	114369283	114369604	6	321
1	114385440	114385746	6	306
1	114567329	114567641	6	312
1	115030236	115030563	6	327
1	115212448	115214827	9	2379
1	115332522	115334171	6	1649
1	115441919	115445012	7	3093
1	115462837	115469307	9	6470
1	115568903	115569211	6	308
1	115658791	115659100	6	309
1	115799988	115804617	9	4629
1	116044544	116053528	9	8984
1	116168360	116170399	6	2039
1	116369228	116369338	1	110
1	116471118	116471437	6	319
1	116707085	116707302	6	217
1	116854360	116854940	821	580
1	116892887	116894993	9	2106
1	117260531	117262372	6	1841
1	117619588	117621617	4	2029
1	117758108	117758421	6	313
1	117877310	117880755	4	3445
1	117971401	117973860	6	2459
1	117977504	117980393	4	2889
1	118137798	118138110	6	312
1	118236933	118241816	4	4883
1	118319123	118321533	6	2410
1	118355053	118362046	4	6993
1	118362885	118365248	4	2363
1	118604698	118605010	6	312
1	118823491	118829529	6	6038
1	118965506	118965844	6	338
1	119093639	119094482	6	843
1	119117978	119120734	6	2756
1	119279491	119279507	1	16
1	119394959	119401018	6	6059
1	119622025	119624301	4	2276
1	119675658	119675931	1	273
1	119807010	119807311	6	301
1	119877397	119877714	6	317
1	120009313	120009513	3	200
1	120096931	120097131	3	200
1	120139471	120139726	1	255
1	120211091	120211410	6	319
1	120247389	120247607	6	218
1	144340516	144340754	1	238
1	144520764	144521012	1	248
1	144901973	144905262	4	3289
1	145474303	145474503	3	200
1	146037814	146038014	3	200
1	146126727	146127077	1	350
1	146136363	146136465	1	102
1	146139587	146139754	1	167
1	146149884	146150718	1	834
1	146512854	146513020	1	166
1	146659734	146662027	4	2293
1	146864716	146865045	6	329
1	147691716	147692550	1	834
1	147793067	147795147	9	2080
1	149294554	149294754	3	200
1	149298520	149298734	3	214
1	149576471	149576706	1	235
1	149970972	149974084	9	3112
1	150204399	150204703	6	304
1	150560403	150560724	6	321
1	150571299	150571624	6	325
1	150575217	150575337	6	120
1	150700401	150702479	6	2078
1	150753313	150755027	6	1714
1	150764942	150765279	6	337
1	150904018	150904156	6	138
1	151098061	151098379	6	318
1	151466120	151469553	4	3433
1	151571749	151574214	6	2465
1	151616069	151618264	9	2195
1	151619516	151620488	6	972
1	151623058	151624758	6	1700
1	151640006	151640325	6	319
1	152152177	152155231	4	3054
1	152160568	152163087	4	2519
1	152357818	152358140	6	322
1	152731876	152734714	4	2838
1	152853881	152854198	6	317
1	152897395	152897711	6	316
1	152928055	152930137	6	2082
1	153094457	153094762	6	305
1	153250913	153252222	6	1309
1	153492638	153492768	6	130
1	153557549	153567057	9	9508
1	153668924	153669269	6	345
1	153676022	153678300	9	2278
1	153802938	153803265	6	327
1	153817041	153817413	6	372
1	154075865	154076191	6	326
1	154098216	154098543	6	327
1	154188315	154188626	6	311
1	154366693	154366873	6	180
1	154421352	154421680	6	328
1	154617984	154618308	6	324
1	155244503	155244817	6	314
1	155487586	155487902	6	316
1	155521166	155521473	6	307
1	155537097	155537400	6	303
1	155596447	155605634	6	9187
1	155643659	155643975	6	316
1	155670296	155671977	6	1681
1	155804611	155805273	6	662
1	155892703	155892991	6	288
1	156149008	156149982	6	974
1	156157188	156157514	6	326
1	156186215	156187047	6	832
1	156297050	156298674	6	1624
1	156368489	156368831	6	342
1	156693860	156701775	9	7915
1	156702497	156708336	9	5839
1	156961495	156961807	6	312
1	156966327	156966582	6	255
1	157637248	157637564	6	316
1	157694098	157694333	1	235
1	157791982	157792261	6	279
1	157916587	157916904	6	317
1	158042447	158042783	6	336
1	158058262	158058582	6	320
1	158145111	158145257	1	146
1	158177040	158177370	6	330
1	158202906	158212447	6	9541
1	158237407	158238720	6	1313
1	158528284	158528592	6	308
1	158804027	158804238	6	211
1	159502577	159502790	6	213
1	159525399	159525728	6	329
1	159869244	159869557	6	313
1	160513972	160522908	4	8936
1	160574586	160582913	9	8327
1	161213873	161214194	6	321
1	161250613	161252240	6	1627
1	161290610	161290915	6	305
1	161293483	161293794	6	311
1	161455422	161459519	4	4097
1	161474460	161477288	4	2828
1	161644439	161649259	4	4820
1	161657098	161657291	6	193
1	161708106	161712167	4	4061
1	161782160	161782496	6	336
1	161893534	161893734	3	200
1	161929195	161929495	6	300
1	162035489	162035631	6	142
1	162259257	162259435	6	178
1	162435150	162436657	6	1507
1	162706910	162709118	6	2208
1	162966532	162966768	6	236
1	162977034	162977360	6	326
1	163207616	163207928	1	312
1	163231932	163232624	6	692
1	163521883	163522156	6	273
1	163534095	163534315	1	220
1	164017455	164017790	6	335
1	164328416	164328743	6	327
1	164350238	164350495	1	257
1	164427555	164427868	6	313
1	164518149	164518467	6	318
1	164533165	164533283	1	118
1	164646323	164646644	6	321
1	164730688	164730996	6	308
1	164927833	164928149	6	316
1	165097639	165105088	9	7449
1	165261017	165261336	6	319
1	165486069	165486347	6	278
1	165509248	165509448	3	200
1	165777347	165777673	6	326
1	165786719	165787039	6	320
1	165830582	165830909	6	327
1	165940034	165943617	6	3583
1	166118096	166118527	6	431
1	166317409	166317588	6	179
1	166480136	166480438	6	302
1	166709099	166709400	6	301
1	167073763	167076609	9	2846
1	167150984	167153864	9	2880
1	167185108	167190480	9	5372
1	167201363	167203595	9	2232
1	167333497	167333791	6	294
1	167404264	167404597	6	333
1	167493337	167496821	4	3484
1	167568695	167569003	6	308
1	167774457	167774657	3	200
1	167866934	167867254	6	320
1	168002545	168002868	6	323
1	168176235	168177908	6	1673
1	168559161	168561591	4	2430
1	168597489	168597717	6	228
1	168643596	168647848	4	4252
1	168656859	168659930	4	3071
1	168722904	168723225	6	321
1	168755267	168755578	6	311
1	168978075	168978397	6	322
1	169120217	169123319	9	3102
1	169197632	169197948	6	316
1	169606251	169606348	6	97
1	169618109	169630562	4	12453
1	169730434	169730749	6	315
1	169779967	169780301	6	334
1	169959160	169959614	6	454
1	170135261	170135596	6	335
1	170225965	170226073	6	108
1	170387362	170389043	6	1681
1	170555465	170555665	3	200
1	170612084	170612280	1	196
1	170717505	170717867	1	362
1	170906660	170906978	6	318
1	171056190	171056501	6	311
1	171188598	171192184	4	3586
1	171216718	171220936	7	4218
1	171261234	171261556	6	322
1	171264616	171264816	3	200
1	171370556	171370855	6	299
1	171394751	171395069	6	318
1	172075989	172076315	6	326
1	172193556	172193835	1	279
1	172428246	172432139	9	3893
1	172495233	172495539	6	306
1	172540261	172541876	6	1615
1	172606532	172610740	4	4208
1	172950397	172956465	6	6068
1	173213498	173213824	6	326
1	173472209	173475569	4	3360
1	173687960	173688268	6	308
1	173958851	173959174	6	323
1	174105312	174105555	6	243
1	174131890	174132170	6	280
1	174202406	174208438	6	6032
1	174317575	174320254	6	2679
1	174333379	174333698	6	319
1	174394789	174399493	9	4704
1	174515885	174516205	6	320
1	174645441	174649325	4	3884
1	174732505	174732827	6	322
1	174812363	174818396	6	6033
1	175078212	175078539	6	327
1	175173420	175173770	8	350
1	175246799	175250235	4	3436
1	175371161	175371482	6	321
1	175399166	175399236	6	70
1	175463955	175466175	9	2220
1	175535112	175535518	1	406
1	175704682	175704908	1	226
1	175722739	175722898	1	159
1	175817626	175821652	9	4026
1	176018025	176018346	6	321
1	176032186	176032506	6	320
1	176236742	176237048	6	306
1	176295382	176295445	6	63
1	176364609	176366762	6	2153
1	176569529	176569844	6	315
1	176601555	176601698	6	143
1	176663120	176663435	8	315
1	176720058	176721511	6	1453
1	177009234	177009502	1	268
1	177087437	177087640	1	203
1	177330926	177343758	91	12832
1	177368255	177368559	6	304
1	177419109	177419427	6	318
1	177572523	177572838	6	315
1	177580823	177581149	1	326
1	177603050	177609130	6	6080
1	177798069	177798385	6	316
1	177864916	177865481	1	565
1	178053622	178053820	6	198
1	178228261	178228544	6	283
1	178254237	178254568	6	331
1	178283919	178289962	6	6043
1	178363595	178363891	1	296
1	178558571	178564010	9	5439
1	178796530	178796844	6	314
1	178906239	178906570	6	331
1	178931363	178933552	4	2189
1	178975630	178978172	9	2542
1	179008839	179010905	6	2066
1	179103534	179105902	6	2368
1	179387098	179388850	6	1752
1	179421541	179421869	6	328
1	179614211	179614532	6	321
1	180059398	180059720	6	322
1	180256477	180259046	4	2569
1	180442298	180442608	6	310
1	180668331	180671611	6	3280
1	180809076	180809399	6	323
1	180835932	180842007	6	6075
1	181342471	181351832	9	9361
1	181365061	181367477	9	2416
1	181777911	181778155	1	244
1	181829152	181829475	6	323
1	181997407	182000588	4	3181
1	182113250	182113450	3	200
1	182457677	182457892	6	215
1	182477794	182479844	6	2050
1	182635108	182635309	3	201
1	182709664	182711930	6	2266
1	182923367	182923682	6	315
1	183082509	183085775	4	3266
1	183101508	183104540	9	3032
1	183215801	183218548	9	2747
1	183244212	183250534	9	6322
1	183267954	183272666	9	4712
1	183446555	183446873	6	318
1	183573285	183573486	3	201
1	183681289	183681489	3	200
1	183741854	183742186	6	332
1	183745286	183745594	6	308
1	183746320	183746470	8	150
1	183820000	183820490	8	490
1	183983186	183985283	9	2097
1	184195432	184198476	9	3044
1	184540144	184540466	6	322
1	184555423	184555728	6	305
1	184689646	184689764	6	118
1	185376269	185376572	6	303
1	185764035	185767784	9	3749
1	186145884	186145938	6	54
1	186221515	186221826	6	311
1	186249061	186249380	6	319
1	186296109	186296476	6	367
1	186350464	186350772	6	308
1	186369111	186369431	6	320
1	186387419	186387628	6	209
1	186427361	186428587	6	1226
1	187132799	187133124	6	325
1	187136403	187136680	6	277
1	187312848	187318945	6	6097
1	187566803	187572910	6	6107
1	187707618	187707668	6	50
1	187792476	187794742	6	2266
1	187816247	187816556	6	309
1	187858384	187858632	6	248
1	187970021	187970337	6	316
1	188056431	188056721	6	290
1	188083743	188084064	6	321
1	188279130	188279428	6	298
1	188487139	188487509	6	370
1	188488666	188489978	6	1312
1	188601900	188602416	61	516
1	188637991	188638446	6	455
1	188969520	188969823	6	303
1	189084960	189085231	6	271
1	189832473	189832908	6	435
1	190122380	190125994	4	3614
1	190381570	190381888	6	318
1	190550474	190550674	3	200
1	190612341	190612397	6	56
1	190615676	190615997	6	321
1	190699431	190704119	6	4688
1	190772748	190773384	6	636
1	191068080	191068366	6	286
1	191101705	191102023	6	318
1	191254273	191254596	6	323
1	191481562	191481879	6	317
1	191585034	191585350	6	316
1	191672729	191673047	6	318
1	192030096	192030296	3	200
1	192067421	192067859	6	438
1	192072307	192072415	6	108
1	192111617	192111727	1	110
1	192469700	192475747	6	6047
1	192602518	192602718	3	200
1	192818162	192820360	9	2198
1	192825454	192827547	6	2093
1	192930088	192930425	6	337
1	193130873	193131282	6	409
1	193203287	193203452	6	165
1	193267725	193267854	6	129
1	193364969	193365244	6	275
1	193387547	193387747	3	200
1	193541875	193541988	6	113
1	193686972	193693037	6	6065
1	193831231	193831568	6	337
1	193836348	193836844	6	496
1	193932444	193932554	1	110
1	194226097	194226425	6	328
1	194241083	194242356	6	1273
1	194300473	194300734	6	261
1	194307560	194308050	8	490
1	194532497	194532827	6	330
1	194534287	194534501	1	214
1	194651191	194651791	6	600
1	194760867	194761178	6	311
1	194874715	194876980	6	2265
1	194969071	194972181	9	3110
1	195520170	195522390	6	2220
1	195873029	195873226	1	197
1	195876724	195876827	6	103
1	195885360	195885679	6	319
1	196065596	196069680	4	4084
1	196188500	196194545	6	6045
1	196571905	196572229	6	324
1	197318947	197319264	6	317
1	197373438	197373610	6	172
1	197374167	197375733	6	1566
1	197497707	197498009	6	302
1	197706647	197709085	4	2438
1	197775062	197775489	6	427
1	198179873	198180162	6	289
1	198293172	198293390	6	218
1	198515200	198515685	6	485
1	198965188	198965505	6	317
1	198992501	198994737	6	2236
1	199025571	199025888	6	317
1	199088490	199088843	6	353
1	199162830	199163137	6	307
1	199186615	199189403	4	2788
1	199435638	199435740	6	102
1	199447797	199448024	6	227
1	199523231	199527609	6	4378
1	199878985	199879310	6	325
1	200126316	200129136	4	2820
1	200148625	200150820	4	2195
1	200243053	200243134	6	81
1	200284035	200284638	1	603
1	200438420	200438690	8	270
1	200542555	200542742	6	187
1	200545324	200545635	6	311
1	200716855	200717147	6	292
1	201469917	201470118	3	201
1	201740287	201740392	6	105
1	201771114	201771283	6	169
1	202159928	202161643	6	1715
1	202222918	202223095	6	177
1	202251720	202251990	8	270
1	202301753	202302076	6	323
1	202310424	202310739	6	315
1	202664608	202664793	1	185
1	202708571	202709757	6	1186
1	203170656	203172999	9	2343
1	203336280	203336530	8	250
1	203408631	203412085	9	3454
1	203887682	203889902	6	2220
1	204140321	204140638	6	317
1	204151117	204151459	6	342
1	204233370	204233409	1	39
1	204440194	204440844	6	650
1	204591529	204591699	1	170
1	204733525	204739151	9	5626
1	204828119	204830318	9	2199
1	204900579	204900750	1	171
1	205299630	205308778	9	9148
1	205314174	205316297	9	2123
1	205343415	205353456	9	10041
1	205411096	205411296	3	200
1	205689224	205696927	9	7703
1	206276035	206278004	6	1969
1	206501018	206506895	6	5877
1	206547377	206547685	6	308
1	206558767	206562195	9	3428
1	206655111	206655434	6	323
1	207481074	207481375	6	301
1	207593944	207595721	7	1777
1	207682168	207682368	3	200
1	207697332	207699676	4	2344
1	207751508	207757301	4	5793
1	207867602	207873555	94	5953
1	207892113	207892637	6	524
1	207910542	207910877	6	335
1	207980798	207983494	9	2696
1	207998280	208014057	9	15777
1	208360056	208360378	6	322
1	208480371	208480682	6	311
1	208608185	208608637	1	452
1	208751067	208751267	3	200
1	208832264	208833018	6	754
1	208910050	208910366	6	316
1	208939489	208939607	6	118
1	208941241	208941707	1	466
1	209074348	209079799	9	5451
1	209127272	209127587	6	315
1	209301783	209303620	6	1837
1	209310699	209313036	9	2337
1	209314535	209315524	6	989
1	209367694	209368044	6	350
1	209434508	209434824	6	316
1	209493455	209493770	6	315
1	209567875	209572538	9	4663
1	209630840	209631070	8	230
1	209734795	209735123	1	328
1	209989200	209989690	8	490
1	210086729	210093182	6	6453
1	210251372	210251690	6	318
1	210436018	210436248	1	230
1	210559565	210559896	6	331
1	210615196	210618019	6	2823
1	210891711	210891920	6	209
1	210934310	210934626	6	316
1	210962027	210962350	6	323
1	211141204	211142203	6	999
1	211208276	211210871	96	2595
1	211233659	211233764	6	105
1	211445958	211446278	6	320
1	211556044	211556244	3	200
1	211557426	211559994	9	2568
1	211836990	211839048	4	2058
1	212015700	212015781	6	81
1	212023556	212023879	6	323
1	212082782	212087361	4	4579
1	212224784	212225406	6	622
1	212253113	212253453	1	340
1	212493290	212495652	6	2362
1	212693476	212693528	6	52
1	212804654	212811081	9	6427
1	212951723	212953871	6	2148
1	213022735	213025449	6	2714
1	213211927	213212257	6	330
1	213323639	213326700	6	3061
1	213444825	213445135	6	310
1	213463375	213463481	6	106
1	213477266	213477587	6	321
1	213759461	213759974	1	513
1	213877447	213877764	6	317
1	214096166	214096748	6	582
1	214102710	214102882	1	172
1	214202295	214202547	1	252
1	214549280	214549570	8	290
1	214558840	214558914	6	74
1	214622354	214622661	6	307
1	214796080	214796261	6	181
1	215041922	215044020	6	2098
1	215227649	215227849	3	200
1	215304193	215304512	6	319
1	215846403	215846591	1	188
1	215921205	215921484	6	279
1	215944639	215944969	6	330
1	216356754	216357348	18	594
1	216643027	216643288	6	261
1	216885960	216886546	1	586
1	217057082	217059181	4	2099
1	217138105	217138347	1	242
1	217227958	217228105	1	147
1	217633637	217633841	1	204
1	217696502	217698284	6	1782
1	217863785	217869888	6	6103
1	217877574	217877905	6	331
1	217944112	217944690	1	578
1	218024622	218024798	1	176
1	218030542	218030819	1	277
1	218086604	218086894	6	290
1	218392866	218393180	1	314
1	218428301	218428846	1	545
1	218482318	218484455	9	2137
1	219378460	219378743	6	283
1	219628918	219631421	6	2503
1	219718283	219720268	6	1985
1	219758472	219761724	4	3252
1	220046134	220046668	6	534
1	220243886	220244401	6	515
1	220418498	220420289	6	1791
1	220426790	220428567	6	1777
1	220515589	220519373	9	3784
1	220639042	220640931	6	1889
1	220838581	220838894	6	313
1	221168682	221170306	6	1624
1	221362740	221363070	6	330
1	221505860	221511920	4	6060
1	221612707	221615956	4	3249
1	221780395	221780712	6	317
1	221819726	221823306	9	3580
1	222137592	222137911	6	319
1	222771422	222775816	9	4394
1	222776630	222783795	9	7165
1	222943869	222947255	43	3386
1	223059740	223060440	8	700
1	223491163	223492803	6	1640
1	223568866	223574900	6	6034
1	223669586	223669901	6	315
1	223823244	223824518	6	1274
1	224287826	224289465	6	1639
1	224460444	224460768	6	324
1	224527527	224528501	6	974
1	224716721	224716921	3	200
1	224767352	224767552	3	200
1	224898815	224898858	1	43
1	225116410	225118536	4	2126
1	225227389	225227600	6	211
1	225808985	225809294	6	309
1	225931449	225931759	6	310
1	226152229	226152443	6	214
1	226227689	226228018	6	329
1	226284770	226288042	9	3272
1	226293089	226298428	9	5339
1	226505314	226505641	6	327
1	226507091	226511205	9	4114
1	226594920	226597899	9	2979
1	226621348	226623497	4	2149
1	226697048	226699915	4	2867
1	226720064	226720134	6	70
1	226985304	226986033	6	729
1	227047569	227047886	6	317
1	227590422	227594069	9	3647
1	227706474	227710326	9	3852
1	228058481	228058671	6	190
1	228064893	228065208	6	315
1	228184205	228188810	9	4605
1	228288030	228288336	1	306
1	228319171	228319319	6	148
1	228381201	228381513	6	312
1	228385858	228385931	6	73
1	228457254	228457845	6	591
1	228636832	228637153	1	321
1	228654226	228654298	6	72
1	228729324	228737007	9	7683
1	228739153	228741412	9	2259
1	228817564	228819745	9	2181
1	228987287	228989586	9	2299
1	228991518	228997401	9	5883
1	229007236	229007436	3	200
1	229088228	229091223	4	2995
1	229341835	229347914	9	6079
1	229368934	229369245	6	311
1	229763846	229763993	6	147
1	229831082	229831189	6	107
1	230000027	230002508	9	2481
1	230043116	230046917	4	3801
1	230066932	230068397	6	1465
1	230208005	230210437	9	2432
1	230370450	230374852	9	4402
1	230529293	230529587	6	294
1	230544872	230551206	9	6334
1	230553026	230563556	9	10530
1	230573128	230573652	7	524
1	230608789	230620536	9	11747
1	230719320	230724773	9	5453
1	230768228	230771150	9	2922
1	230982693	230982870	6	177
1	231040000	231040313	6	313
1	231126759	231129040	4	2281
1	231257597	231261773	4	4176
1	231263376	231265156	6	1780
1	231602553	231605160	4	2607
1	231626906	231627208	6	302
1	231674967	231675300	1	333
1	231706064	231706523	6	459
1	231831560	231831760	3	200
1	232052123	232052418	6	295
1	232104220	232104356	6	136
1	232170400	232170630	8	230
1	232466974	232468849	6	1875
1	232852207	232852522	6	315
1	232861013	232861192	6	179
1	232959320	232960703	6	1383
1	233210049	233210368	6	319
1	233253468	233253774	6	306
1	233305097	233305403	6	306
1	233803179	233803494	6	315
1	233925274	233925642	6	368
1	234142442	234142616	6	174
1	234162231	234162343	1	112
1	234212727	234213054	6	327
1	234386104	234386415	6	311
1	234402610	234404241	6	1631
1	234405357	234411354	9	5997
1	234699819	234702432	9	2613
1	234707634	234707834	3	200
1	235471740	235473507	6	1767
1	235503758	235504063	6	305
1	236047412	236047721	6	309
1	236198284	236198946	6	662
1	236259500	236261758	4	2258
1	236939942	236940255	6	313
1	237151457	237159426	9	7969
1	237178777	237179084	6	307
1	237182725	237188795	6	6070
1	237207560	237207935	81	375
1	237238552	237244601	6	6049
1	237286942	237287229	6	287
1	237290047	237291718	6	1671
1	237396027	237399294	9	3267
1	237672027	237672343	6	316
1	238497460	238497710	8	250
1	238659340	238659819	6	479
1	239133262	239133463	6	201
1	239976924	239977232	6	308
1	240192775	240192976	3	201
1	240203572	240203890	6	318
1	240348229	240348486	6	257
1	240560932	240564745	4	3813
1	240751207	240751408	3	201
1	240928539	240932156	4	3617
1	240933170	240935766	9	2596
1	241135529	241136025	6	496
1	241578966	241579573	6	607
1	241672334	241672390	6	56
1	241924055	241924234	6	179
1	241938444	241942515	9	4071
1	242208833	242214892	6	6059
1	242222311	242225036	4	2725
1	242410267	242410584	6	317
1	242513807	242514007	3	200
1	242835213	242839661	4	4448
1	242905990	242910132	4	4142
1	243216422	243216810	1	388
1	243364665	243364776	1	111
1	243428176	243428376	3	200
1	243459826	243460133	6	307
1	243490615	243490810	6	195
1	243502283	243502396	6	113
1	243502411	243502466	1	55
1	243522346	243522663	6	317
1	243639588	243639662	1	74
1	243907749	243908057	6	308
1	243958742	243959073	6	331
1	244200840	244200990	8	150
1	244208179	244208444	6	265
1	244271528	244273627	9	2099
1	244275503	244277518	9	2015
1	244353853	244354053	6	200
1	244474373	244476394	4	2021
1	244607523	244607837	6	314
1	244652739	244653507	6	768
1	244875888	244877888	9	2000
1	245320617	245320734	1	117
1	245362206	245362406	3	200
1	245389034	245389269	1	235
1	245466490	245466800	6	310
1	245748622	245748822	3	200
1	245749894	245750208	6	314
1	245751245	245751445	3	200
1	245845702	245846007	6	305
1	245851420	245851950	8	530
1	245937910	245939042	6	1132
1	245969926	245970252	6	326
1	246230840	246231550	8	710
1	246470702	246471021	6	319
1	246525710	246527219	6	1509
1	246551138	246553071	6	1933
1	246590546	246590842	6	296
1	246593071	246593462	6	391
1	247230847	247231164	6	317
1	247279183	247282216	6	3033
1	247348197	247348325	1	128
1	247383193	247384555	6	1362
1	247546688	247554675	4	7987
1	247619287	247622195	4	2908
1	247643557	247643660	6	103
1	247684608	247686245	6	1637
1	248098951	248101825	4	2874
1	248114255	248117657	4	3402
1	248384400	248385134	6	734
2	126154	127656	6	1502
2	192433	194533	4	2100
2	229444	233286	64	3842
2	233800	241223	4	7423
2	381498	385311	4	3813
2	436378	447376	4	10998
2	495180	495840	6	660
2	671407	671884	6	477
2	988749	988977	6	228
2	1001716	1002097	6	381
2	1066832	1067360	6	528
2	1346377	1350009	6	3632
2	1608100	1610606	4	2506
2	1818434	1824687	9	6253
2	1886123	1891414	9	5291
2	2245439	2245731	6	292
2	2572348	2574882	9	2534
2	2593308	2593497	1	189
2	2626862	2629023	4	2161
2	2786539	2786625	6	86
2	2860425	2860479	6	54
2	3273001	3273509	6	508
2	3314141	3314457	6	316
2	3338399	3346676	9	8277
2	3501137	3501563	7	426
2	3616041	3617618	6	1577
2	3637664	3639952	6	2288
2	4564065	4564265	3	200
2	4610292	4610628	6	336
2	5189894	5190856	6	962
2	5337038	5340057	6	3019
2	5419848	5420804	6	956
2	5523772	5524099	6	327
2	5567022	5567350	6	328
2	5884750	5885069	6	319
2	5902087	5902407	6	320
2	5977746	5978066	6	320
2	6138536	6138854	6	318
2	6485395	6485718	1	323
2	6560020	6560347	6	327
2	6674629	6678725	4	4096
2	6704433	6704810	1	377
2	7058623	7058930	6	307
2	7075719	7075909	6	190
2	7095109	7103179	9	8070
2	7464877	7465126	1	249
2	7477842	7478507	6	665
2	8012025	8012161	1	136
2	8129056	8131117	4	2061
2	8145462	8145795	6	333
2	8180927	8181868	6	941
2	8234121	8236360	4	2239
2	8264054	8264380	6	326
2	8515482	8515562	6	80
2	8549680	8550270	8	590
2	9018923	9019238	6	315
2	9136176	9136376	3	200
2	9342309	9342630	6	321
2	9410922	9411238	6	316
2	9606308	9606480	6	172
2	10057918	10058227	6	309
2	10138579	10139007	6	428
2	10281794	10286924	9	5130
2	10495295	10495619	6	324
2	10637148	10639478	4	2330
2	10694271	10694572	6	301
2	10764086	10764814	6	728
2	10838582	10838901	6	319
2	10944398	10946181	6	1783
2	11042070	11044064	6	1994
2	11136224	11142276	6	6052
2	11242506	11242669	1	163
2	11316655	11316967	6	312
2	11531931	11531952	1	21
2	11692852	11693160	6	308
2	11761490	11761690	3	200
2	11892562	11892869	6	307
2	12061151	12061650	18	499
2	12262658	12263533	6	875
2	12486293	12487216	6	923
2	12500624	12500946	6	322
2	12538254	12538438	1	184
2	12614751	12615069	6	318
2	12632039	12633092	6	1053
2	12887442	12887674	6	232
2	13016265	13016580	6	315
2	13067481	13068012	6	531
2	13661762	13663890	4	2128
2	13958921	13959467	6	546
2	14266684	14266976	6	292
2	14349951	14350267	6	316
2	14359777	14359977	3	200
2	14788693	14790875	4	2182
2	14802057	14803270	6	1213
2	14837416	14837799	1	383
2	14941928	14943199	6	1271
2	14988187	14994234	6	6047
2	15208167	15208367	3	200
2	15213946	15217888	4	3942
2	15359430	15360414	6	984
2	15477186	15480613	9	3427
2	15636730	15638485	7	1755
2	15641693	15641814	6	121
2	15681865	15682801	6	936
2	15750989	15753215	6	2226
2	15819987	15821359	6	1372
2	15850948	15851266	6	318
2	15889633	15891962	9	2329
2	16196096	16196135	12	39
2	16224877	16225057	12	180
2	16273796	16274106	6	310
2	16340721	16341029	6	308
2	16551160	16551276	6	116
2	16661525	16664171	4	2646
2	16736740	16736793	6	53
2	16756840	16757187	6	347
2	16774954	16781040	6	6086
2	17199734	17200020	6	286
2	17553962	17554263	6	301
2	17699479	17699679	3	200
2	17721672	17721872	3	200
2	18092368	18094826	4	2458
2	18094967	18098787	4	3820
2	18193280	18199300	6	6020
2	18349349	18353152	4	3803
2	18443150	18444039	6	889
2	18503023	18503339	6	316
2	18946664	18946961	6	297
2	19056688	19057033	6	345
2	19068616	19068790	6	174
2	19132821	19133161	6	340
2	19276928	19280076	4	3148
2	19661653	19661796	1	143
2	19668351	19668450	6	99
2	20024086	20024286	3	200
2	20031355	20033315	6	1960
2	20067686	20069848	4	2162
2	20152545	20152687	6	142
2	20156382	20156690	6	308
2	20247168	20247466	6	298
2	20439503	20444075	49	4572
2	20458413	20458742	6	329
2	20645734	20645970	6	236
2	20698159	20698282	1	123
2	20798300	20798626	6	326
2	20858292	20858615	6	323
2	20943074	20943186	6	112
2	21023386	21023690	6	304
2	21029421	21045832	9	16411
2	21088862	21089161	6	299
2	21139181	21141917	4	2736
2	21158469	21161140	9	2671
2	21194513	21194827	6	314
2	21475216	21475777	1	561
2	21572792	21573097	6	305
2	21676287	21676953	18	666
2	21721039	21721345	1	306
2	21741640	21741777	1	137
2	21742295	21742526	1	231
2	21873202	21873467	1	265
2	21882002	21882324	1	322
2	21980620	21981350	81	730
2	22181799	22181901	1	102
2	22257597	22261484	4	3887
2	22551960	22552710	81	750
2	22560392	22560717	6	325
2	22630850	22633975	9	3125
2	22650655	22650755	6	100
2	22657837	22657908	1	71
2	22822540	22822789	81	249
2	22886044	22886184	1	140
2	22951908	22952223	6	315
2	23125049	23125329	1	280
2	23168533	23168845	6	312
2	23216030	23216055	1	25
2	23264260	23264470	8	210
2	23430475	23433741	4	3266
2	23447707	23453771	6	6064
2	23555047	23555340	1	293
2	23591530	23591838	6	308
2	23637713	23637838	1	125
2	23656902	23657218	6	316
2	23683585	23683760	6	175
2	23725997	23726197	3	200
2	23831324	23831814	1	490
2	24543088	24543424	6	336
2	24557649	24557973	6	324
2	25269377	25269686	6	309
2	25303790	25304198	1	408
2	25362773	25378430	96	15657
2	25685578	25685886	6	308
2	25752130	25752330	3	200
2	25775710	25775994	6	284
2	25856025	25857974	6	1949
2	25945509	25947030	6	1521
2	26032794	26033230	1	436
2	26132573	26134573	6	2000
2	26185609	26185893	6	284
2	26301770	26304253	4	2483
2	26592738	26594796	6	2058
2	26792905	26793190	8	285
2	26879111	26879439	6	328
2	27017544	27018319	6	775
2	27090315	27090638	6	323
2	27196419	27196738	6	319
2	27573303	27579931	9	6628
2	27620754	27623305	9	2551
2	27669551	27669880	6	329
2	27682846	27683819	6	973
2	27716160	27716650	8	490
2	27761968	27764328	6	2360
2	28006842	28007165	6	323
2	28263150	28263469	6	319
2	28293419	28293559	6	140
2	29314927	29317845	6	2918
2	29423580	29423714	6	134
2	29434845	29435045	3	200
2	29668683	29669001	6	318
2	29813655	29813976	6	321
2	29840944	29841144	3	200
2	29975201	29975522	6	321
2	30053778	30054167	6	389
2	30087740	30087935	1	195
2	30664236	30664427	6	191
2	30684639	30684950	6	311
2	30704858	30705164	1	306
2	30759964	30760280	6	316
2	30776399	30776706	6	307
2	30836336	30837310	6	974
2	31024732	31029521	49	4789
2	31091342	31091666	6	324
2	31298474	31298518	1	44
2	31342740	31343055	6	315
2	31662104	31662434	6	330
2	31756145	31759439	4	3294
2	31801056	31802251	6	1195
2	31915454	31915766	6	312
2	32090866	32091189	6	323
2	32303023	32303300	6	277
2	32318224	32318397	6	173
2	32518084	32520143	6	2059
2	32671795	32673761	6	1966
2	32979203	32980726	6	1523
2	32992504	32992829	6	325
2	33032643	33035720	4	3077
2	33085937	33090249	4	4312
2	33099017	33101808	4	2791
2	33149417	33154731	4	5314
2	33235687	33238045	4	2358
2	33308933	33309133	3	200
2	33363900	33364224	6	324
2	33479608	33480686	6	1078
2	33598869	33605495	4	6626
2	33773131	33773447	6	316
2	33930033	33930349	1	316
2	33957146	33957460	6	314
2	34152171	34152486	6	315
2	34236694	34238827	4	2133
2	34292941	34298270	4	5329
2	34319854	34324180	4	4326
2	34478967	34479181	6	214
2	34609951	34610173	1	222
2	34637456	34637761	6	305
2	34666248	34669556	9	3308
2	34792309	34792506	1	197
2	34797610	34801579	6	3969
2	34819380	34820297	6	917
2	34907307	34907445	6	138
2	35044596	35045238	6	642
2	35732358	35732567	1	209
2	35816584	35816897	6	313
2	35857730	35858054	6	324
2	35931360	35931683	6	323
2	36090508	36090828	6	320
2	36137582	36137740	1	158
2	36406435	36408319	6	1884
2	36566967	36567298	1	331
2	36616426	36616665	1	239
2	36654940	36655220	8	280
2	36752990	36753338	1	348
2	37144148	37144221	6	73
2	37261464	37261781	6	317
2	37391442	37391762	6	320
2	37452455	37453429	6	974
2	37598508	37598594	6	86
2	37746497	37747235	6	738
2	37780502	37782641	4	2139
2	37862826	37870114	9	7288
2	38159179	38160959	6	1780
2	38190445	38191391	6	946
2	38221207	38221987	7	780
2	38260969	38261148	1	179
2	38433629	38433691	6	62
2	38629696	38631531	6	1835
2	38719637	38720444	6	807
2	38732029	38740994	9	8965
2	38931559	38933941	4	2382
2	39224736	39224830	6	94
2	39333439	39333758	6	319
2	39405995	39408650	9	2655
2	39453562	39453629	6	67
2	39490404	39490720	6	316
2	39592719	39592914	6	195
2	39623611	39623910	6	299
2	39836618	39836722	1	104
2	39854640	39856399	6	1759
2	39935548	39935857	6	309
2	39994448	39994761	6	313
2	40274443	40274643	3	200
2	40277040	40277240	3	200
2	40334322	40334439	6	117
2	40343452	40343751	6	299
2	40442486	40442812	6	326
2	40723908	40724219	6	311
2	40793897	40794233	6	336
2	41010944	41011125	1	181
2	41136311	41136410	6	99
2	41290701	41290755	6	54
2	41311542	41311562	1	20
2	41385028	41385341	6	313
2	41726082	41729541	9	3459
2	41735258	41742256	9	6998
2	41878578	41880750	4	2172
2	42222118	42223394	6	1276
2	42240858	42242786	6	1928
2	42260531	42260838	6	307
2	42564512	42567032	9	2520
2	42591217	42591406	6	189
2	42618719	42619042	6	323
2	42765875	42766216	6	341
2	42775951	42776008	6	57
2	42831696	42834276	6	2580
2	43020786	43020986	3	200
2	43094138	43096336	9	2198
2	43289628	43291260	6	1632
2	43300010	43300329	6	319
2	43523956	43525746	6	1790
2	43525771	43525971	3	200
2	43561749	43561939	6	190
2	43694027	43694343	6	316
2	43904335	43905918	6	1583
2	44252259	44252551	1	292
2	44293352	44295520	6	2168
2	44656710	44656968	6	258
2	44707105	44707276	1	171
2	44720746	44721389	1	643
2	44814554	44817058	6	2504
2	44897618	44904322	4	6704
2	44944607	44944914	1	307
2	45560690	45560886	1	196
2	45650036	45654120	9	4084
2	45657900	45662519	9	4619
2	45904451	45904759	6	308
2	45907824	45908024	3	200
2	45978937	45979255	6	318
2	46056914	46057231	6	317
2	46107995	46108309	6	314
2	46249935	46250249	6	314
2	46383056	46383212	6	156
2	46550508	46556064	9	5556
2	46556312	46558361	9	2049
2	46692990	46693250	6	260
2	46752315	46752628	6	313
2	46798705	46801536	9	2831
2	46851967	46854039	9	2072
2	47391081	47391406	6	325
2	47415256	47415367	6	111
2	47425143	47429456	9	4313
2	47507883	47507935	6	52
2	47614144	47618057	4	3913
2	47659536	47661716	6	2180
2	47718215	47718404	6	189
2	47899280	47899587	6	307
2	47952534	47952620	6	86
2	48367910	48367971	6	61
2	48696528	48696686	6	158
2	48840969	48842700	6	1731
2	48877659	48888053	9	10394
2	49158753	49159073	6	320
2	49212843	49213170	6	327
2	49444182	49444358	1	176
2	49465128	49465595	1	467
2	49482822	49483023	3	201
2	49583403	49583679	1	276
2	49611237	49611357	1	120
2	49720169	49720485	6	316
2	49776850	49777050	3	200
2	49800269	49800587	6	318
2	49829759	49829959	3	200
2	49897353	49897676	6	323
2	49956746	49957089	6	343
2	50037793	50038112	6	319
2	50085379	50090134	9	4755
2	50092382	50092723	6	341
2	50096987	50097247	6	260
2	50199950	50200150	3	200
2	50281694	50282858	1	1164
2	50297625	50297936	6	311
2	50522255	50522455	3	200
2	50573272	50573472	3	200
2	50708886	50709206	6	320
2	51054728	51056920	6	2192
2	51179075	51179393	6	318
2	51275427	51275731	6	304
2	51508010	51508346	6	336
2	51976988	51977317	6	329
2	52028924	52029239	6	315
2	52095389	52095710	6	321
2	52112985	52114985	9	2000
2	52166165	52167074	6	909
2	52199121	52199451	6	330
2	52332592	52332747	6	155
2	52382976	52383301	6	325
2	52400435	52400750	6	315
2	52528806	52529156	6	350
2	52573920	52574233	6	313
2	52657330	52662070	9	4740
2	52666723	52670005	9	3282
2	52732985	52733302	6	317
2	52797784	52797971	1	187
2	52957331	52957525	6	194
2	53069703	53070112	6	409
2	53109641	53117296	4	7655
2	53341860	53342050	8	190
2	53558090	53558370	6	280
2	53710769	53710969	3	200
2	53715317	53722047	4	6730
2	53814146	53820197	6	6051
2	53871637	53871961	6	324
2	53919602	53922836	9	3234
2	54084073	54084404	6	331
2	54322007	54324011	6	2004
2	54687109	54689121	9	2012
2	54712271	54713885	6	1614
2	54749772	54749860	6	88
2	54846090	54846291	3	201
2	54880104	54887206	9	7102
2	54909083	54914253	9	5170
2	55017846	55018162	6	316
2	55158083	55158398	6	315
2	55381344	55381548	3	204
2	55649064	55649265	3	201
2	55877116	55879038	6	1922
2	55922990	55923305	6	315
2	56000050	56001902	6	1852
2	56022264	56022594	6	330
2	56244506	56246843	4	2337
[truncated: 17,476 more rows]

## Sheet: TableS2
Table S2: Results of mapping genome-wide significant GWAS variants to PSI regions by trait*
GWAS	trait	sample	GWAS-variant	GWAS-loci	PSI-variant	PSI-loci	mapped-loci%	Original GWAS reference	data source
1	Attention deficit hyperactivity disorder	55374	303	12	0	0	0	Demontis et al. Nature Genetics. 2019;51(1):63-75.	http://www.med.unc.edu/pgc/results-and-downloads
2	Autism Spectrum Disorder (autism)	46350	93	5	0	0	0	Grove et al. Nature Genetics. 2019;51(3):431-44.	http://www.med.unc.edu/pgc/results-and-downloads
3	Bipolar Disorder	198882	264	30	2	1	0.033	Stahl et al. Nature Genetics. 2019;51(5):793-803.	http://www.med.unc.edu/pgc/results-and-downloads
4	Depression	807553	4625	102	52	10	0.098	Howard et al. Nat Neurosci. 2019;22(3):343-52.	http://www.med.unc.edu/pgc/results-and-downloads
5	Schizophrenia	306011	22344	270	137	40	0.148	Trubetskoy et al. Nature. 2022;604(7906):502-8.	http://www.med.unc.edu/pgc/results-and-downloads
6	Anorexia nervosa	72517	326	8	13	3	0.375	Watson et al. Nat Genet. 2019;51(8):1207-14.	http://www.med.unc.edu/pgc/results-and-downloads
7	Alcohol dependence	52848	142	3	0	0	0	Walters et al. Nature Neuroscience. 2018;21(12):1656-69.	http://www.med.unc.edu/pgc/results-and-downloads
8	Ever smoked	518633	9734	223	45	16	0.072	Karlsson et al. Nat Genet. 2019;51(2):245-57.	https://www.thessgac.org/data
9	Height	253288	26539	697	151	54	0.077	Wood et al. Nat Genet. 2014;46(11):1173-86.	https://www.broadinstitute.org/collaboration/giant
10	Body mass index (BMI)	700000	42616	941	232	97	0.103	Yengo et al. Hum Mol Genet. 2018;27(20):3641-9.	https://www.broadinstitute.org/collaboration/giant
11	Waist-to-Hip Ratio (WHR)	694649	24275	463	135	44	0.095	Pulit et al. Hum Mol Genet. 2019;28(1):166-74.	https://www.broadinstitute.org/collaboration/giant
12	Drinks per week (Drinking)	414343	6367	85	19	8	0.094	Karlsson et al. Nat Genet. 2019;51(2):245-57.	https://www.thessgac.org/data
13	urate	457690	19097	183	138	28	0.153	Tin et al. Nat Genet. 2019;51(10):1459-74.	http://ckdgen.imbi.uni-freiburg.de/
14	Coronary artery disease (CAD)	148715	2686	79	67	11	0.139	Nelson et al. Nat Genet. 2017;49(9):1385-91.	http://www.cardiogramplusc4d.org/data-downloads/
15	Type 2 diabetes (T2D) in Europeans	157401	12595	152	54	20	0.132	Mahajan et al. Nat Genet. 2018;50(11):1505-13.	http://diagram-consortium.org/downloads.html
16	T2D in East Asians	211793	18317	301	146	41	0.136	Spracklen et al. Nature. 2020;582(7811):240-5.	https://blog.nus.edu.sg/agen/summary-statistics/t2d-2020/
17	Inflammatory Bowel Disease (IBD)	96486	8076	231	29	14	0.061	Liu et al. Nat Genet. 2015;47(9):979-86.	http://www.ibdgenetics.org/downloads.html
18	gout	334880	4319	55	36	6	0.109	Tin et al. Nat Genet. 2019;51(10):1459-74.	http://ckdgen.imbi.uni-freiburg.de/
19	Epilepsy	44889	402	16	0	0	0	Abou-Khalil et al. Nat Commun. 2018;9(1):5269.	http://www.epigad.org
20	Alzheimer	74046	699	19	3	1	0.053	Lambert et al. Nat Genet. 2013;45(12):1452-8.	http://web.pasteur-lille.fr/en/recherche/u744/igap/igap_download.php
21	Cognitive performance	257841	13714	225	65	20	0.089	Lee et al. Nat Genet. 2018;50(8):1112-21.	https://www.thessgac.org/data
22	Education attainment	1100000	30519	1271	151	47	0.037	Lee et al. Nat Genet. 2018;50(8):1112-21.	https://www.thessgac.org/data
23	Cerebral cortex	51665	1228	279	2	1	0.004	Grasby et al. Science. 2020;367(6484):eaay6690.	http://enigma.ini.usc.edu/research/download-enigma-gwas-results/
24	Subcortical brain structure	38851	3837	48	22	6	0.125	Satizabal et al. Nat Genet. 2019;51(11):1624-36.	http://enigma.ini.usc.edu/research/download-enigma-gwas-results/
25	White matter hyperdensity	11226	83	3	0	0	0	Traylor et al. Neurology. 2019;92(8):e749-e57.	http://enigma.ini.usc.edu/research/download-enigma-gwas-results/
*: Quantitative traits italic and underlined; GWAS-variant (loci): number of genome-wide significant variants (loci) identified in the original GWAS paper;
PSI-variant (loci): number of GWAS variants (loci) mapped to PSI regions; mapped-loci%: percentage of GWAS loci mapped

## Sheet: TableS3
Table S3: List of 1499 GWAS variants mapped to PSI regions*
CHR	POS	mapped_PSItype	PSItype_check	trait
1	23431777	9	9	BMI
1	43958999	9	9	Education
1	43959023	9	9	Education
1	44353084	9	9	Cognitive
1	44353084	9	9	Education
1	44353237	9	9	Education
1	44353237	9	9	Schizophrenia
1	44354661	9	9	Education
1	44356609	9	9	Cognitive
1	44356609	9	9	Education
1	46567652	6	6	T2D_EAS
1	49353863	1	1	BMI
1	49627502	4	4	BMI
1	49627659	4	4	BMI
1	50445126	6	6	Depression
1	50846747	6	6	T2D_EAS
1	50847109	6	6	T2D_EAS
1	50847336	6	6	T2D_EAS
1	50847647	6	6	T2D_EAS
1	50847836	6	6	T2D_EAS
1	50848204	6	6	T2D_EAS
1	57719736	1	1	Education
1	65543255	1	1	WHR
1	69389242	6	6	Cognitive
1	69389242	6	6	Education
1	69389574	6	6	Cognitive
1	69389574	6	6	Education
1	73894065	9	9	Smoking
1	73894065	9	9	Schizophrenia
1	73894065	9	9	Depression
1	73894150	9	9	Smoking
1	73894150	9	9	Schizophrenia
1	73894150	9	9	Depression
1	73894382	9	9	Education
1	73894459	9	9	Smoking
1	73894459	9	9	Schizophrenia
1	73894459	9	9	Depression
1	73894644	9	9	Education
1	73894768	9	9	Schizophrenia
1	73894768	9	9	Depression
1	73895051	9	9	Depression
1	73895169	9	9	Depression
1	73895448	9	9	Education
1	73895982	9	9	Depression
1	73896105	9	9	Depression
1	73896218	9	9	Smoking
1	73896218	9	9	Schizophrenia
1	73897246	9	9	Smoking
1	73897246	9	9	Schizophrenia
1	73897246	9	9	Depression
1	73897381	9	9	Smoking
1	73897381	9	9	Schizophrenia
1	73897381	9	9	Depression
1	73897809	9	9	Smoking
1	73897809	9	9	Schizophrenia
1	73897809	9	9	Depression
1	73898030	9	9	Smoking
1	73898030	9	9	Schizophrenia
1	73898030	9	9	Depression
1	73898258	9	9	Smoking
1	73898258	9	9	Schizophrenia
1	73898258	9	9	Depression
1	73899639	9	9	Smoking
1	73899639	9	9	Schizophrenia
1	73899742	9	9	Schizophrenia
1	73899742	9	9	Depression
1	73900932	9	9	Smoking
1	73900932	9	9	Schizophrenia
1	73900932	9	9	Depression
1	73900947	9	9	Schizophrenia
1	73901834	9	9	Education
1	73902953	9	9	Depression
1	73902988	9	9	Smoking
1	73902988	9	9	Schizophrenia
1	73904211	9	9	Schizophrenia
1	73904211	9	9	Depression
1	73904937	9	9	Schizophrenia
1	73904937	9	9	Depression
1	73905414	9	9	Schizophrenia
1	73905414	9	9	Depression
1	73905524	9	9	Schizophrenia
1	73905524	9	9	Depression
1	73905868	9	9	Education
1	73999568	9	9	Depression
1	73999717	9	9	Education
1	74005206	9	9	Depression
1	78276977	6	6	BMI
1	86083571	9	9	WHR
1	93845655	9	9	Education
1	93845655	9	9	urate
1	93845674	9	9	Education
1	93845674	9	9	urate
1	96935263	6	6	anorexia_nervosa
1	98409303	4	4	Education
1	98409303	4	4	Schizophrenia
1	98409901	4	4	Education
1	98409901	4	4	Schizophrenia
1	119624163	4	4	WHR
1	119624163	4	4	BMI
1	150753487	6	6	urate
1	155244683	6	6	urate
1	172193668	1	1	Height
1	172193820	1	1	Height
1	172428632	9	9	Height
1	172428632	9	9	WHR
1	172429245	9	9	WHR
1	172431026	9	9	Height
1	172431026	9	9	WHR
1	172431062	9	9	WHR
1	172431210	9	9	Height
1	172431210	9	9	WHR
1	172431892	9	9	WHR
1	183084229	4	4	Height
1	183085304	4	4	Height
1	183085696	4	4	Height
1	183085755	4	4	Height
1	183101686	9	9	Height
1	183103551	9	9	Height
1	183103604	9	9	Height
1	183983580	9	9	Height
1	183983718	9	9	Height
1	183984717	9	9	Height
1	183985203	9	9	Height
1	184197041	9	9	Height
1	190122674	4	4	BMI
1	197374175	6	6	IBD
1	212015756	6	6	urate
1	212023856	6	6	urate
1	212083512	4	4	urate
1	219628927	6	6	WHR
1	219628927	6	6	T2D_EUR
1	219759407	4	4	WHR
1	219759481	4	4	WHR
1	219759682	4	4	Height
1	219759733	4	4	WHR
1	219759733	4	4	T2D_EUR
1	222772660	9	9	CAD
1	222779187	9	9	CAD
1	222781932	9	9	CAD
1	227591621	9	9	Height
1	227707361	9	9	Height
1	227707361	9	9	WHR
1	227709546	9	9	Height
2	230442	64	4	BMI
2	230912	64	4	BMI
2	239597	4	4	BMI
2	240054	4	4	BMI
2	382409	4	4	BMI
2	384236	4	4	BMI
2	437664	4	4	BMI
2	440230	4	4	BMI
2	441139	4	4	BMI
2	445185	4	4	BMI
2	445471	4	4	BMI
2	445604	4	4	BMI
2	445636	4	4	BMI
2	446942	4	4	BMI
2	16663494	4	4	Education
2	16664016	4	4	Education
2	16664068	4	4	Education
2	22633151	9	9	Schizophrenia
2	22633542	9	9	Schizophrenia
2	22650673	6	6	Schizophrenia
2	25366130	96	9	Height
2	25366130	96	9	BMI
2	25368005	96	9	Height
2	25368005	96	9	BMI
2	25369002	96	9	Height
2	25369002	96	9	BMI
2	25369040	96	9	Height
2	25369040	96	9	BMI
2	25373298	96	9	Height
2	25373298	96	9	BMI
2	25375105	96	9	Height
2	25375105	96	9	BMI
2	25375905	96	9	Height
2	25375905	96	9	BMI
2	25377176	96	9	WHR
2	25377329	96	9	Height
2	25377329	96	9	BMI
2	25378372	96	9	Height
2	25378372	96	9	WHR
2	27574159	9	9	Drinking
2	27574159	9	9	urate
2	27574159	9	9	gout
2	27574953	9	9	Drinking
2	27574953	9	9	urate
2	27574953	9	9	gout
2	27574953	9	9	T2D_EUR
2	27579231	9	9	Drinking
2	27579231	9	9	urate
2	27579231	9	9	gout
2	27579231	9	9	T2D_EUR
2	27620827	9	9	Drinking
2	27620827	9	9	urate
2	27620827	9	9	gout
2	27682850	6	6	Drinking
2	27682850	6	6	urate
2	27682850	6	6	gout
2	27682850	6	6	T2D_EUR
2	27716494	8	8	Drinking
2	27716494	8	8	urate
2	27716494	8	8	gout
2	27716494	8	8	T2D_EUR
2	27764122	6	6	urate
2	27764199	6	6	T2D_EAS
2	37864141	9	9	WHR
2	37865070	9	9	WHR
2	37865129	9	9	WHR
2	37865348	9	9	WHR
2	37865491	9	9	WHR
2	37865620	9	9	WHR
2	37865696	9	9	WHR
2	37865774	9	9	WHR
2	37865962	9	9	WHR
2	37866143	9	9	WHR
2	37867494	9	9	WHR
2	37867611	9	9	WHR
2	37868252	9	9	WHR
2	37869494	9	9	WHR
2	41737200	9	9	BMI
2	41740314	9	9	BMI
2	43561929	6	6	WHR
2	43694048	6	6	T2D_EUR
2	44720752	1	1	BMI
2	46852033	9	9	BMI
2	51056712	6	6	Education
2	51508312	6	6	Education
2	54882816	9	9	urate
2	54885370	9	9	Height
2	54885596	9	9	Height
2	54912259	9	9	Height
2	54913312	9	9	Height
2	58498481	4	4	Schizophrenia
2	58498481	4	4	WHR
2	58500141	4	4	Schizophrenia
2	58500141	4	4	WHR
2	60175475	1	1	BMI
2	60708402	9	9	Cognitive
2	60708402	9	9	Education
2	60710571	9	9	Cognitive
2	60710571	9	9	Education
2	61622885	6	6	urate
2	66759843	1	1	WHR
2	67744538	9	9	WHR
2	85725354	9	9	CAD
2	85808573	9	9	CAD
2	85808737	9	9	CAD
2	85808871	9	9	CAD
2	85808982	9	9	CAD
2	85809670	9	9	CAD
2	85809703	9	9	CAD
2	85809711	9	9	CAD
2	85809955	9	9	CAD
2	85809989	9	9	CAD
2	98883839	6	6	Education
2	98883859	6	6	Education
2	100699994	3	3	Education
2	100732845	9	9	Education
2	100734471	9	9	BMI
2	100734946	9	9	Cognitive
2	100734946	9	9	Education
2	100765692	1	1	Education
2	100781566	6	6	Education
2	100857017	9	9	Education
2	100857984	9	9	Cognitive
2	100857984	9	9	Education
2	100857984	9	9	BMI
2	100858122	9	9	Cognitive
2	100858122	9	9	Education
2	100858122	9	9	BMI
2	113993344	812	8	urate
2	136583192	4	4	BMI
2	146146094	6	6	Smoking
2	146258263	1	1	Smoking
2	158329237	4	4	T2D_EUR
2	158330391	4	4	WHR
2	162858200	9	9	Cognitive
2	162858200	9	9	Smoking
2	162859000	9	9	Cognitive
2	162859000	9	9	Education
2	165752007	4	4	WHR
2	165752007	4	4	T2D_EUR
2	170030917	4	4	urate
2	170200452	4	4	urate
2	170201439	4	4	urate
2	170201843	4	4	urate
2	170201858	4	4	urate
2	170202833	4	4	urate
2	170203104	4	4	urate
2	170204773	4	4	urate
2	170204800	4	4	urate
2	170204846	4	4	urate
2	170205123	4	4	urate
2	170205425	4	4	urate
2	170206062	4	4	urate
2	174973726	1	1	BMI
2	178632479	4	4	Height
2	178632793	4	4	Height
2	185811940	6	6	Schizophrenia
2	198789013	6	6	Schizophrenia
2	198933804	9	9	Schizophrenia
2	198933948	9	9	Schizophrenia
2	198934080	9	9	Schizophrenia
2	198934726	9	9	Schizophrenia
2	200963752	4	4	Schizophrenia
2	203650998	6	6	CAD
2	203781741	6	6	CAD
2	208297345	1	1	BMI
2	213057499	1	1	urate
2	219017462	4	4	IBD
2	219658170	9	9	Height
2	219658170	9	9	BMI
2	227136020	4	4	T2D_EUR
2	227136202	4	4	T2D_EUR
2	227136341	4	4	T2D_EUR
2	227136814	4	4	T2D_EUR
2	227137125	4	4	T2D_EUR
2	234151031	4	4	IBD
3	11476270	9	9	WHR
3	11642114	8	8	BMI
3	12246422	9	9	WHR
3	12437978	9	9	WHR
3	12439348	9	9	WHR
3	12442731	9	9	WHR
3	12442833	9	9	WHR
3	12443657	9	9	WHR
3	12443844	9	9	WHR
3	12443844	9	9	T2D_EUR
3	12445807	9	9	WHR
3	12446004	9	9	WHR
3	12447153	9	9	WHR
3	12449528	9	9	WHR
3	12449683	9	9	WHR
3	12449866	9	9	BMI
3	12449963	9	9	WHR
3	12450354	9	9	WHR
3	12925190	4	4	BMI
3	12926096	4	4	BMI
3	13540334	9	9	Height
3	17800423	4	4	Schizophrenia
3	17801811	4	4	Schizophrenia
3	20731156	6	6	BMI
3	23111190	6	6	T2D_EAS
3	23150333	1	1	T2D_EAS
3	34460643	6	6	Smoking
3	47292183	9	9	WHR
3	47292827	9	9	WHR
3	48702606	9	9	IBD
3	48702606	9	9	Cognitive
3	48702606	9	9	Education
3	48702606	9	9	anorexia_nervosa
3	48702742	9	9	anorexia_nervosa
3	48702890	9	9	anorexia_nervosa
3	48703422	9	9	anorexia_nervosa
3	48703917	9	9	Cognitive
3	48703917	9	9	Education
3	48703917	9	9	anorexia_nervosa
3	48708347	9	9	Cognitive
3	48708347	9	9	Education
3	48708347	9	9	CAD
3	48708575	9	9	IBD
3	48708575	9	9	Cognitive
3	48708575	9	9	Education
3	48708575	9	9	anorexia_nervosa
3	48709246	9	9	Cognitive
3	48709246	9	9	Education
3	48709246	9	9	anorexia_nervosa
3	48709463	9	9	anorexia_nervosa
3	48709529	9	9	Cognitive
3	48709529	9	9	Education
3	48709529	9	9	anorexia_nervosa
3	48710301	9	9	anorexia_nervosa
3	48710606	9	9	Cognitive
3	48710606	9	9	Education
3	48710606	9	9	anorexia_nervosa
3	48710739	9	9	Education
3	48772714	6	6	Cognitive
3	48772714	6	6	Education
3	48772714	6	6	anorexia_nervosa
3	49765483	9	9	IBD
3	49765483	9	9	Cognitive
3	49765483	9	9	Education
3	49765483	9	9	WHR
3	49765483	9	9	BMI
3	49768927	9	9	Education
3	49769071	9	9	Cognitive
3	49769071	9	9	Education
3	49769071	9	9	BMI
3	49769419	9	9	Cognitive
3	49769419	9	9	Education
3	49770032	9	9	IBD
3	49770032	9	9	Cognitive
3	49770032	9	9	Education
3	49770032	9	9	WHR
3	49770032	9	9	BMI
3	50759683	3	3	Height
3	50825303	1	1	Height
3	50825303	1	1	BMI
3	52800731	6	6	Cognitive
3	52800731	6	6	Schizophrenia
3	52822509	9	9	Cognitive
3	52822509	9	9	Schizophrenia
3	52822509	9	9	urate
3	52822509	9	9	WHR
3	52822789	9	9	Cognitive
3	52822789	9	9	Schizophrenia
3	52822789	9	9	urate
3	52822856	9	9	Cognitive
3	52822856	9	9	Schizophrenia
3	52822856	9	9	urate
3	52822921	9	9	Cognitive
3	52822921	9	9	Schizophrenia
3	52822921	9	9	Height
3	52822921	9	9	urate
3	52822921	9	9	WHR
3	52822921	9	9	BMI
3	52823126	9	9	Cognitive
3	52823126	9	9	Schizophrenia
3	52823126	9	9	Height
3	52823126	9	9	urate
3	52823126	9	9	WHR
3	52823126	9	9	BMI
3	52823430	9	9	Schizophrenia
3	52823430	9	9	Height
3	52823430	9	9	WHR
3	52823430	9	9	BMI
3	52823448	9	9	Cognitive
3	52823448	9	9	Schizophrenia
3	52823448	9	9	Height
3	52823448	9	9	urate
3	52823448	9	9	WHR
3	52823448	9	9	BMI
3	52845105	9	9	Schizophrenia
3	52845105	9	9	WHR
3	52845105	9	9	BMI
3	52845105	9	9	Bipolar
3	52847544	9	9	WHR
3	52847601	9	9	Schizophrenia
3	52847601	9	9	WHR
3	52847601	9	9	BMI
3	52847601	9	9	Bipolar
3	52848896	9	9	Schizophrenia
3	52848896	9	9	urate
3	52848896	9	9	gout
3	53046496	6	6	urate
3	53046697	6	6	urate
3	53254111	9	9	WHR
3	57978283	9	9	Height
3	61273542	4	4	BMI
3	64076478	6	6	T2D_EAS
3	64076548	6	6	T2D_EAS
3	81893929	1	1	BMI
3	85563846	1	1	Smoking
3	85563846	1	1	Drinking
3	85563846	1	1	BMI
3	85875862	1	1	Smoking
3	85875862	1	1	BMI
3	107307266	9	9	WHR
3	107308598	9	9	WHR
3	107983504	9	9	BMI
3	127117445	9	9	Education
3	127119044	9	9	Education
3	152515097	6	6	T2D_EUR
3	156963598	4	4	BMI
3	156966235	4	4	BMI
3	156967195	4	4	BMI
3	161263939	9	9	Drinking
3	170596118	6	6	T2D_EUR
3	170601047	6	6	T2D_EUR
3	170602073	6	6	T2D_EUR
3	170720021	4	4	T2D_EUR
3	170721231	4	4	T2D_EUR
3	185288661	6	6	T2D_EAS
3	185552030	6	6	T2D_EAS
3	185646406	9	9	Height
4	1209383	3	3	T2D_EAS
4	1222508	9	9	T2D_EAS
4	1222563	9	9	T2D_EAS
4	1222836	9	9	T2D_EAS
4	1223124	9	9	T2D_EAS
4	1224046	9	9	T2D_EAS
4	10269632	1	1	urate
4	10269647	1	1	urate
4	10296636	43	4	urate
4	10296699	43	4	urate
4	10296699	43	4	gout
4	10296760	43	4	urate
4	10296760	43	4	gout
4	10297239	43	4	urate
4	10297330	43	4	urate
4	10297330	43	4	gout
4	10297417	43	4	urate
4	10297417	43	4	gout
4	10297447	43	4	urate
4	10297447	43	4	gout
4	10297679	43	4	urate
4	10297679	43	4	gout
4	10297864	43	4	urate
4	10298094	43	4	urate
4	10298094	43	4	gout
4	10298095	43	4	urate
4	10298095	43	4	gout
4	10298147	43	4	urate
4	10298147	43	4	gout
4	10298337	43	4	urate
4	10298337	43	4	gout
4	10298583	43	4	urate
4	10298583	43	4	gout
4	10298683	43	4	urate
4	10298704	43	43	urate
4	10298704	43	43	gout
4	10322032	4	4	urate
4	10322185	4	4	urate
4	10322363	4	4	urate
4	10322730	4	4	urate
4	10322823	4	4	urate
4	10323100	4	4	urate
4	10323935	4	4	urate
4	10323935	4	4	gout
4	10324160	4	4	urate
4	10324160	4	4	gout
4	10324312	4	4	urate
4	10324312	4	4	gout
4	10324361	4	4	urate
4	10324361	4	4	gout
4	10324554	4	4	urate
4	10325243	4	4	urate
4	10325489	4	4	urate
4	10325489	4	4	gout
4	10410748	3	3	urate
4	10410748	3	3	gout
4	33701687	6	6	Schizophrenia
4	39351868	9	9	Drinking
4	39351868	9	9	Height
4	39352820	9	9	Drinking
4	48972651	4	4	Height
4	48972943	4	4	Height
4	57781754	9	9	Height
4	88907631	9	9	urate
4	88908136	9	9	urate
4	88908136	9	9	gout
4	88909033	9	9	urate
4	88909033	9	9	gout
4	88909088	9	9	urate
4	88909088	9	9	gout
4	88909197	9	9	urate
4	88909197	9	9	gout
4	88909335	9	9	urate
4	88909335	9	9	gout
4	88909436	9	9	urate
4	88909436	9	9	gout
4	89107818	6	6	urate
4	94440026	9	9	BMI
4	94441283	9	9	BMI
4	99499842	9	9	Drinking
4	103132116	6	6	Cognitive
4	103132116	6	6	BMI
4	112760715	4	4	BMI
4	112760745	4	4	BMI
4	112761160	4	4	BMI
4	112762050	4	4	BMI
4	112762156	4	4	BMI
4	114795140	7	7	Height
4	114795839	7	7	Height
4	114796258	7	7	Height
4	114797242	7	7	Height
4	114797391	7	7	Height
4	114797639	7	7	Height
4	114798303	7	7	Height
4	114798855	7	7	Height
4	123503492	4	4	IBD
4	123507914	4	4	IBD
4	123509421	4	4	IBD
4	123509713	4	4	IBD
4	123538912	4	4	IBD
4	159667113	6	6	Education
4	160636696	6	6	Education
4	163702362	4	4	Education
4	163702781	4	4	Education
5	37072824	49	49	Height
5	45767419	4	4	Schizophrenia
5	60752953	6	6	Education
5	60752953	6	6	BMI
5	64187430	4	4	BMI
5	64870306	6	6	Subcortical
5	74565153	6	6	BMI
5	74566173	6	6	T2D_EAS
5	80845428	9	9	BMI
5	80846886	9	9	BMI
5	80848090	9	9	BMI
5	87840688	5	5	Education
5	87840688	5	5	BMI
5	87911015	6	6	Education
5	87929515	1	1	Education
5	88277945	9	9	Height
5	88278293	9	9	Height
5	88280965	9	9	Height
5	102634029	1	1	WHR
5	107578213	4	4	BMI
5	113811947	6	6	Education
5	118682789	9	9	WHR
5	118683065	9	9	WHR
5	118683346	9	9	WHR
5	118683431	9	9	WHR
5	128988287	8	8	Height
5	130651211	3	3	Height
5	131681926	6	6	Height
5	132056874	9	9	IBD
5	132057589	9	9	IBD
5	132057838	9	9	IBD
5	132058296	9	9	IBD
5	132058466	9	9	IBD
5	132058479	9	9	IBD
5	132058698	9	9	IBD
5	134132269	9	9	Height
5	140135536	9	9	Schizophrenia
5	151909029	4	4	Education
5	152004727	9	9	Education
5	152004727	9	9	Schizophrenia
5	152005941	9	9	Education
5	152005941	9	9	Schizophrenia
5	152006087	9	9	Education
5	152006087	9	9	Schizophrenia
5	152006997	9	9	Education
5	152006997	9	9	Schizophrenia
5	152007075	9	9	Education
5	152007075	9	9	Schizophrenia
5	152031650	9	9	Education
5	158029363	9	9	WHR
5	158029703	9	9	WHR
5	158030622	9	9	WHR
5	158635102	81	81	IBD
5	171145255	9	9	Height
5	172989869	9	9	Height
5	172991573	9	9	Height
5	172994458	9	9	Height
5	172994624	9	9	Height
5	172994744	9	9	Height
5	172995160	9	9	Height
5	172999405	9	9	Height
5	172999527	9	9	Height
5	173000002	9	9	Height
6	7221443	6	6	T2D_EAS
6	12150800	9	9	BMI
6	12150811	9	9	BMI
6	12175433	4	4	BMI
6	20544699	6	6	T2D_EAS
6	20544743	6	6	T2D_EAS
6	20723057	9	9	T2D_EUR
6	20723057	9	9	T2D_EAS
6	20724234	9	9	T2D_EUR
6	20724234	9	9	T2D_EAS
6	20724250	9	9	T2D_EUR
6	20724250	9	9	T2D_EAS
6	20724558	9	9	T2D_EUR
6	20724558	9	9	T2D_EAS
6	20724775	9	9	T2D_EUR
6	20724775	9	9	T2D_EAS
6	20725007	9	9	T2D_EUR
6	20725007	9	9	T2D_EAS
6	20725097	9	9	T2D_EUR
6	20725097	9	9	T2D_EAS
6	20725240	9	9	T2D_EUR
6	20725240	9	9	T2D_EAS
6	20725423	9	9	T2D_EUR
6	20725423	9	9	T2D_EAS
6	25257530	4	4	Schizophrenia
6	25257530	4	4	urate
6	25257785	4	4	Schizophrenia
6	25257785	4	4	urate
6	25575402	9	9	urate
6	25575514	9	9	urate
6	26047473	6	6	urate
6	26614951	4	4	BMI
6	26987900	3	3	Schizophrenia
6	27224633	4	4	Schizophrenia
6	27279982	4	4	Height
6	27280407	4	4	Schizophrenia
6	27343726	4	4	Height
6	27374818	4	4	Depression
6	27375611	4	4	Depression
6	27376001	4	4	Depression
6	27455138	69	9	Schizophrenia
6	27456242	69	9	Depression
6	27457317	69	9	Depression
6	27459923	69	9	Cognitive
6	27459923	69	9	Schizophrenia
6	27459923	69	9	urate
6	27459923	69	9	Depression
6	27728827	4	4	Cognitive
6	27728827	4	4	Schizophrenia
6	27728827	4	4	urate
6	27728827	4	4	Depression
6	27730064	4	4	Cognitive
6	27730064	4	4	Schizophrenia
6	27730064	4	4	urate
6	27730064	4	4	Depression
6	27730082	4	4	Cognitive
6	27730082	4	4	Schizophrenia
6	27730082	4	4	urate
6	27730082	4	4	Depression
6	27730334	4	4	Cognitive
6	27730334	4	4	Schizophrenia
6	27730334	4	4	urate
6	27730334	4	4	Depression
6	27730334	4	4	WHR
6	27730463	4	4	Cognitive
6	27730463	4	4	Schizophrenia
6	27730463	4	4	urate
6	27730463	4	4	Depression
6	27795418	6	6	Depression
6	27824766	6	6	Depression
6	27852011	6	6	Depression
6	28058635	4	4	Schizophrenia
6	28058635	4	4	Depression
6	28058949	4	4	Cognitive
6	28058949	4	4	Schizophrenia
6	28058949	4	4	urate
6	28058949	4	4	Depression
6	28059020	4	4	Schizophrenia
6	28059020	4	4	Depression
6	28059217	4	4	Schizophrenia
6	28059217	4	4	Depression
6	28059437	4	4	Schizophrenia
6	28059437	4	4	Depression
6	28060005	4	4	Schizophrenia
6	28060005	4	4	Depression
6	31238053	1	1	Schizophrenia
6	35114542	9	9	Height
6	51652335	1	1	Education
6	53998123	9	9	BMI
6	93071015	4	4	Schizophrenia
6	93071096	4	4	Schizophrenia
6	93072061	4	4	Schizophrenia
6	93072504	4	4	Schizophrenia
6	98870458	6	6	Smoking
6	105444058	4	4	Height
6	105445364	4	4	Height
6	116335637	4	4	Height
6	116477493	4	4	Height
6	126868567	6	6	T2D_EAS
6	126868567	6	6	Cortical
6	126943898	6	6	Cortical
6	141300184	4	4	Height
6	141301076	4	4	Height
6	141301761	4	4	Height
6	142355491	9	9	Height
6	142355986	9	9	Height
6	142687305	9	9	Height
6	142687414	9	9	Height
6	154323909	4	4	BMI
6	158683509	9	9	Height
6	158683646	9	9	Height
6	158687250	9	9	Height
6	160740313	9	9	WHR
6	160740313	9	9	BMI
6	160740721	9	9	CAD
6	160740836	9	9	CAD
6	160741009	9	9	WHR
6	160741009	9	9	BMI
6	160741106	9	9	WHR
6	160741508	9	9	WHR
6	160741508	9	9	BMI
6	160741622	9	9	CAD
6	160741830	9	9	WHR
6	160741830	9	9	BMI
6	160741894	9	9	WHR
6	160741894	9	9	BMI
6	160742216	9	9	WHR
6	160742216	9	9	BMI
6	160743897	9	9	WHR
6	160744151	9	9	WHR
7	2205956	1	1	Education
7	2205956	1	1	Schizophrenia
7	2912928	4	4	Height
7	2913079	4	4	Height
7	3144377	4	4	BMI
7	19617100	1	1	Height
7	19617135	1	1	Height
7	19617300	1	1	Height
7	19618427	1	1	Height
7	24531534	1	1	Education
7	26829759	1	1	IBD
7	26853470	1	1	IBD
7	32357659	4	4	Education
7	32357659	4	4	BMI
7	32358313	4	4	Education
7	32358313	4	4	BMI
7	32359277	4	4	Education
7	50152583	9	9	Education
7	50152675	9	9	Education
7	50153231	9	9	Education
7	50153579	9	9	Education
7	50607206	9	9	BMI
7	50607388	9	9	BMI
7	50610071	9	9	BMI
7	54709291	4	4	Education
7	54711985	4	4	Education
7	69099111	6	6	T2D_EAS
7	69099174	6	6	T2D_EAS
7	69099203	6	6	T2D_EAS
7	69627349	6	6	T2D_EAS
7	69648162	1	1	Cognitive
7	69648162	1	1	BMI
7	69648162	1	1	T2D_EAS
7	69667660	6	6	T2D_EAS
7	69667883	6	6	T2D_EAS
7	69896093	6	6	T2D_EAS
7	69902152	1	1	Cognitive
7	69902152	1	1	T2D_EAS
7	73032265	4	4	Drinking
7	73032265	4	4	urate
7	73032265	4	4	gout
7	73032265	4	4	WHR
7	73032823	4	4	urate
7	73032835	4	4	Drinking
7	73032835	4	4	urate
7	73032835	4	4	gout
7	73032835	4	4	WHR
7	73033559	4	4	Drinking
7	73033559	4	4	urate
7	73033559	4	4	gout
7	73034030	4	4	Drinking
7	73034030	4	4	urate
7	73034030	4	4	gout
7	98970675	9	9	Smoking
7	98970675	9	9	BMI
7	98974588	9	9	Smoking
7	114412664	1	1	BMI
7	117582736	9	9	Education
7	117582736	9	9	Smoking
7	117582736	9	9	Depression
7	126852475	6	6	T2D_EAS
7	127426983	6	6	Cognitive
7	140487079	6	6	T2D_EAS
7	150640285	9	9	BMI
7	156787800	9	9	T2D_EAS
8	8902371	4	4	WHR
8	8902371	4	4	BMI
8	8902424	4	4	WHR
8	8902424	4	4	BMI
8	8903134	4	4	WHR
8	8903134	4	4	BMI
8	8904639	4	4	WHR
8	8904639	4	4	BMI
8	8904862	4	4	WHR
8	8904862	4	4	BMI
8	8938003	4	4	BMI
8	9204425	4	4	BMI
8	9204567	4	4	BMI
8	9204878	4	4	BMI
8	9205505	4	4	BMI
8	11591136	9	9	WHR
8	11593033	9	9	WHR
8	11593033	9	9	BMI
8	11594970	9	9	WHR
8	11594970	9	9	BMI
8	11595829	9	9	WHR
8	11595969	9	9	WHR
8	11595969	9	9	BMI
8	11596163	9	9	WHR
8	11596163	9	9	BMI
8	11596437	9	9	WHR
8	11596437	9	9	BMI
8	11636884	9	9	WHR
8	11648590	9	9	WHR
8	11648590	9	9	BMI
8	11650475	9	9	WHR
8	11650475	9	9	BMI
8	20912874	4	4	Cognitive
8	37391203	9	9	T2D_EAS
8	37391850	9	9	T2D_EAS
8	38191375	6	6	Schizophrenia
8	41415012	6	6	T2D_EAS
8	41537104	6	6	T2D_EAS
8	41537318	6	6	T2D_EAS
8	42349764	9	9	Subcortical
8	42350489	9	9	Subcortical
8	42351176	9	9	Education
8	42351176	9	9	Subcortical
8	42351311	9	9	Education
8	42351311	9	9	Subcortical
8	42351328	9	9	Education
8	42351328	9	9	Subcortical
8	42351585	9	9	Education
8	42351585	9	9	Subcortical
8	42352007	9	9	Education
8	42352007	9	9	Subcortical
8	42352161	9	9	Education
8	42352161	9	9	Subcortical
8	42352502	9	9	Education
8	42352502	9	9	Subcortical
8	42353515	9	9	Education
8	42353515	9	9	Subcortical
8	42353558	9	9	Education
8	42353558	9	9	Subcortical
8	76539154	6	6	urate
8	92570896	6	6	Smoking
8	116717451	1	1	BMI
8	116791749	1	1	BMI
8	116823610	9	9	BMI
8	116824201	9	9	BMI
8	116824700	9	9	BMI
8	118214520	1	1	T2D_EAS
8	118895013	9	9	BMI
8	118895712	9	9	BMI
8	121361212	6	6	WHR
8	143756218	4	4	Education
8	143756530	4	4	Education
8	143756919	4	4	Education
8	143757037	4	4	Education
8	143757286	4	4	Education
8	143757409	4	4	Education
8	143757708	4	4	Education
8	143757763	4	4	Education
8	143759137	4	4	Education
8	143759364	4	4	Education
8	143760256	4	4	Education
8	143760444	4	4	Education
8	143761144	4	4	Education
9	1794752	9	9	Education
9	16718266	1	1	Height
9	21973838	4	4	CAD
9	21973857	4	4	CAD
9	21974218	4	4	CAD
9	21975319	4	4	CAD
9	22348827	6	6	T2D_EAS
9	22352705	6	6	T2D_EAS
9	35769371	9	9	Height
9	81900744	6	6	T2D_EUR
9	81900744	6	6	T2D_EAS
9	90852161	4	4	Height
9	90852236	4	4	Height
9	95226702	4	4	Height
9	95226702	4	4	WHR
9	97913076	9	9	Height
9	109652983	1	1	Height
9	117642418	4	4	IBD
9	117643362	4	4	IBD
9	119122437	1	1	Height
9	119126101	9	9	Height
9	119126970	9	9	Height
9	119368441	9	9	Height
9	120444525	9	9	BMI
9	124597993	9	9	Education
9	124599027	9	9	Education
9	127015440	9	9	BMI
9	127108146	9	9	BMI
9	134892125	8	8	Education
9	134961697	4	4	Education
9	134961834	4	4	Education
9	134963590	4	4	Education
9	134963917	4	4	Education
9	139274523	6	6	T2D_EAS
10	12281866	6	6	T2D_EAS
10	12282002	6	6	T2D_EAS
10	44435882	3	3	CAD
10	44459605	9	9	CAD
10	44462959	9	9	CAD
10	44466480	9	9	CAD
10	44467958	9	9	CAD
10	44471109	9	9	CAD
10	44471284	9	9	CAD
10	44472469	9	9	CAD
10	44734391	6	6	CAD
10	44734464	6	6	CAD
10	44734602	6	6	CAD
10	61441210	6	6	urate
10	61456572	6	6	urate
10	67879440	9	9	Education
10	67880339	9	9	Education
10	67883742	9	9	Education
10	67883846	9	9	Education
10	67885634	9	9	Education
10	67885991	9	9	Education
10	67886750	9	9	Education
10	67888050	9	9	Education
10	67889078	9	9	Education
10	70011354	8	8	Height
10	70211037	9	9	Height
10	70213964	9	9	Height
10	70217052	9	9	Height
10	70220535	9	9	Height
10	70221194	9	9	Height
10	70225504	9	9	Height
10	71469514	43	4	T2D_EUR
10	71469969	43	4	T2D_EUR
10	71470825	43	4	T2D_EUR
10	94391166	6	6	T2D_EAS
10	94391274	6	6	T2D_EAS
10	94391365	6	6	T2D_EAS
10	94391370	6	6	T2D_EAS
10	94433461	6	6	T2D_EAS
10	94435673	6	6	T2D_EAS
10	94435683	6	6	T2D_EAS
10	94503393	9	9	T2D_EAS
10	94515985	9	9	T2D_EAS
10	94516008	9	9	T2D_EAS
10	94516468	9	9	T2D_EAS
10	94516663	9	9	T2D_EAS
10	94516813	9	9	T2D_EAS
10	94517064	9	9	T2D_EAS
10	94517759	9	9	T2D_EAS
10	94735056	6	6	T2D_EAS
10	94736168	6	6	T2D_EAS
10	95764306	9	9	WHR
10	112616346	6	6	T2D_EAS
10	122833135	6	6	T2D_EAS
10	122948222	1	1	T2D_EAS
10	125256095	4	4	BMI
11	2646151	1	1	T2D_EAS
11	2646517	1	1	T2D_EUR
11	2646620	1	1	T2D_EUR
11	8639200	9	9	BMI
11	8639994	9	9	BMI
11	10331311	9	9	WHR
11	10331664	9	9	WHR
11	10342711	1	1	WHR
11	30718534	1	1	urate
11	30759938	6	6	urate
11	30760087	6	6	urate
11	30760280	6	6	urate
11	36376603	9	9	WHR
11	36376782	9	9	WHR
11	41435037	9	9	Smoking
11	41435589	9	9	Smoking
11	41435765	9	9	Smoking
11	41436297	9	9	Smoking
11	41438442	9	9	Smoking
11	43810459	9	9	BMI
11	43813776	9	9	BMI
11	46919895	676	7	Schizophrenia
11	46922133	676	7	Schizophrenia
11	46922596	676	7	Schizophrenia
11	46923107	676	7	Schizophrenia
11	46927877	676	7	Schizophrenia
11	46928455	676	7	Schizophrenia
11	46928455	676	7	BMI
11	46929777	676	7	Schizophrenia
11	46929954	676	7	Schizophrenia
11	46934369	676	7	Schizophrenia
11	46934369	676	7	BMI
11	46935185	676	7	Schizophrenia
11	46958299	676	7	Schizophrenia
11	46958299	676	7	BMI
11	46966633	676	7	Schizophrenia
11	46977408	676	7	Schizophrenia
11	46982163	676	7	Schizophrenia
11	46983238	676	7	Schizophrenia
11	47013441	676	7	Schizophrenia
11	47036950	676	7	Schizophrenia
11	47054448	676	7	BMI
11	47487740	5	5	Height
11	59948374	4	4	Alzhemier
11	59951433	4	4	Alzhemier
11	59952316	4	4	Alzhemier
11	62192931	9	9	WHR
11	62370527	9	9	WHR
11	62371773	9	9	WHR
11	62378221	9	9	WHR
11	62381808	9	9	WHR
11	63859751	3	3	urate
11	64469393	6	6	urate
11	64469524	6	6	urate
11	64764094	9	9	urate
11	64770458	9	9	urate
11	64771179	9	9	urate
11	65218038	6	6	urate
11	65218101	6	6	urate
11	65218688	6	6	urate
11	65255589	2	2	urate
11	65255589	2	2	T2D_EUR
11	65256164	2	2	urate
11	65256164	2	2	T2D_EUR
11	65257329	2	2	urate
11	65257329	2	2	T2D_EUR
11	65257527	2	2	urate
11	65257527	2	2	T2D_EUR
11	65329392	9	9	T2D_EUR
11	65523782	6	6	urate
11	69306579	9	9	BMI
11	69306595	9	9	BMI
11	69307011	9	9	BMI
11	69307444	9	9	BMI
11	76156973	9	9	IBD
11	83331889	6	6	Subcortical
11	111661455	9	9	WHR
11	111661686	9	9	WHR
11	111662109	9	9	WHR
11	112782064	1	1	Smoking
11	112782162	1	1	Smoking
11	112912724	9	9	Smoking
11	112912811	9	9	Smoking
11	112912947	9	9	Smoking
11	112912947	9	9	BMI
11	112913053	9	9	BMI
11	112913691	9	9	Smoking
11	112914680	9	9	Smoking
11	112915157	9	9	Smoking
11	120212423	9	9	Height
11	133811072	1	1	Education
11	133811160	1	1	BMI
11	134530726	4	4	Schizophrenia
11	134531267	4	4	Schizophrenia
11	134531636	4	4	Schizophrenia
11	134531650	4	4	Schizophrenia
11	134531882	4	4	Schizophrenia
11	134532595	4	4	Schizophrenia
12	29020321	4	4	Height
12	29020690	4	4	Height
12	29022051	4	4	Height
12	29022763	4	4	Height
12	48646995	96	9	Education
12	48647506	96	9	Education
12	89743614	1	1	BMI
12	89743921	1	1	BMI
12	97575105	9	9	BMI
12	97654460	4	4	Education
12	99467812	9	9	BMI
12	99468230	9	9	BMI
12	99469108	9	9	BMI
12	99469927	9	9	BMI
12	102846020	6	6	Subcortical
12	102850223	1	1	Subcortical
12	103684233	1	1	BMI
12	103684285	1	1	BMI
12	112930475	9	9	T2D_EAS
12	114607167	4	4	Smoking
12	117614077	9	9	BMI
12	117614699	9	9	BMI
12	121484873	6	6	T2D_EAS
12	121513402	6	6	T2D_EAS
12	121514540	6	6	T2D_EAS
12	121679861	9	9	Schizophrenia
12	121681138	9	9	Schizophrenia
12	122511238	9	9	urate
12	122511754	9	9	urate
12	122843225	6	6	WHR
12	122843225	6	6	BMI
12	123063912	6	6	BMI
12	123533239	6	6	Education
12	123533239	6	6	Schizophrenia
12	124138346	9	9	WHR
12	124139597	9	9	WHR
13	31836770	9	9	Depression
13	33208172	9	9	Height
13	33208172	9	9	BMI
13	33289750	6	6	Height
13	33289750	6	6	BMI
13	55816142	6	6	Education
13	56545785	6	6	Schizophrenia
13	58388024	3	3	Education
13	59178258	9	9	BMI
13	62335391	6	6	Education
13	72341727	1	1	urate
13	72341788	1	1	urate
13	79894736	9	9	Schizophrenia
13	79897564	9	9	Schizophrenia
13	79898236	9	9	Schizophrenia
13	79968211	3	3	Schizophrenia
13	85978618	4	4	BMI
13	99193519	3	3	Education
14	38832994	6	6	T2D_EAS
14	42143061	6	6	Depression
14	42143231	6	6	Depression
14	47309496	1	1	BMI
14	58755480	9	9	WHR
14	58756421	9	9	WHR
14	60797112	4	4	Height
14	60797545	4	4	Height
14	60798009	4	4	Education
14	60798366	4	4	Height
14	60798682	4	4	Height
14	60798753	4	4	Height
14	60798753	4	4	WHR
14	60999275	8	8	Height
14	60999275	8	8	WHR
14	94838142	9	9	Drinking
14	98575499	1	1	Cognitive
14	98596553	4	4	Cognitive
14	98596555	4	4	Cognitive
14	98597552	4	4	Smoking
14	98597582	4	4	Cognitive
14	98599036	4	4	Cognitive
14	103925457	9	9	Height
14	103925457	9	9	BMI
14	103925740	9	9	Depression
14	103926024	9	9	Depression
14	103926655	9	9	Depression
14	103927805	9	9	Height
14	103927805	9	9	BMI
14	103928112	9	9	Depression
14	104269098	9	9	Schizophrenia
14	104269808	9	9	Schizophrenia
14	104270000	9	9	Schizophrenia
14	104270659	9	9	Schizophrenia
15	36391694	1	1	BMI
15	36391772	1	1	BMI
15	36391781	1	1	BMI
15	42109975	9	9	WHR
15	42109975	9	9	T2D_EUR
15	42111298	9	9	WHR
15	42111298	9	9	T2D_EUR
15	42115747	9	9	T2D_EUR
15	42116903	9	9	T2D_EUR
15	46392288	1	1	BMI
15	46559497	4	4	BMI
15	47657951	9	9	Smoking
15	47899868	9	9	Smoking
15	50870271	9	9	Education
15	51898505	9	9	Cognitive
15	51898584	9	9	Cognitive
15	51898637	9	9	Cognitive
15	51898754	9	9	Cognitive
15	51899884	9	9	Cognitive
15	51899884	9	9	BMI
15	51900161	9	9	Cognitive
15	51985147	9	9	Cognitive
15	51985275	9	9	Cognitive
15	51985275	9	9	BMI
15	51985564	9	9	Cognitive
15	51985564	9	9	BMI
15	51985835	9	9	BMI
15	51989082	9	9	Cognitive
15	51990247	9	9	Cognitive
15	51990247	9	9	BMI
15	51990787	9	9	Cognitive
15	52442976	9	9	Cognitive
15	62188575	6	6	T2D_EAS
15	62188884	6	6	T2D_EAS
15	62188965	6	6	T2D_EAS
15	62189758	6	6	T2D_EAS
15	62189934	6	6	T2D_EAS
15	62190133	6	6	T2D_EAS
15	62191654	6	6	T2D_EAS
15	62191927	6	6	T2D_EAS
15	62193114	6	6	T2D_EAS
15	62194502	6	6	T2D_EAS
15	62307886	6	6	T2D_EAS
15	68093435	9	9	BMI
15	72203517	3	3	Height
15	75746503	8	8	T2D_EAS
15	75797188	6	6	T2D_EAS
15	77377654	9	9	T2D_EAS
15	77378335	9	9	T2D_EAS
15	77378440	9	9	T2D_EAS
15	77378753	9	9	T2D_EAS
15	77378754	9	9	T2D_EAS
15	77378955	9	9	T2D_EAS
15	77379200	9	9	T2D_EAS
15	77380245	9	9	T2D_EAS
15	77634498	4	4	T2D_EAS
15	77634747	4	4	T2D_EAS
15	77635234	4	4	T2D_EAS
15	77635875	4	4	T2D_EUR
15	77635875	4	4	T2D_EAS
15	77636581	4	4	T2D_EAS
15	77710907	9	9	T2D_EAS
15	77711719	9	9	T2D_EUR
15	77711719	9	9	T2D_EAS
15	77713586	9	9	T2D_EUR
15	77713586	9	9	T2D_EAS
15	78837673	9	9	Schizophrenia
15	79021908	9	9	CAD
15	79022136	9	9	CAD
15	79022343	9	9	CAD
15	79022403	9	9	CAD
15	79022432	9	9	CAD
15	79022615	9	9	CAD
15	79022616	9	9	CAD
15	79023030	9	9	CAD
15	79023433	9	9	CAD
15	79023467	9	9	CAD
15	79023577	9	9	CAD
15	79023578	9	9	CAD
15	79023730	9	9	CAD
15	79023766	9	9	CAD
15	79023805	9	9	CAD
15	79024016	9	9	CAD
15	79024214	9	9	CAD
15	79024268	9	9	CAD
15	79024350	9	9	CAD
15	79025516	9	9	CAD
15	79025577	9	9	CAD
15	79025593	9	9	CAD
15	79025683	9	9	CAD
15	79025963	9	9	CAD
15	79026001	9	9	CAD
15	79026529	9	9	CAD
15	79026541	9	9	CAD
15	79157405	9	9	CAD
15	84606942	6	6	Height
15	89939528	9	9	Schizophrenia
15	90399177	6	6	T2D_EAS
15	90411208	6	6	T2D_EAS
15	91403674	9	9	Schizophrenia
15	91403674	9	9	CAD
15	91404705	9	9	Schizophrenia
15	91404705	9	9	CAD
15	91404788	9	9	Schizophrenia
15	91404788	9	9	CAD
15	91406146	9	9	Schizophrenia
15	91406188	9	9	Schizophrenia
15	91407197	9	9	Schizophrenia
15	91407197	9	9	CAD
15	91407275	9	9	Schizophrenia
15	91407275	9	9	CAD
16	10965597	9	9	WHR
16	11335391	49	4	IBD
16	11337721	49	49	IBD
16	20248208	1	1	T2D_EAS
16	23843121	9	9	BMI
16	23849035	9	9	BMI
16	23860837	9	9	BMI
16	31260422	9	9	BMI
16	31264267	9	9	BMI
16	50804287	9	9	IBD
16	53825905	6	6	T2D_EAS
16	53826028	6	6	T2D_EUR
16	53826028	6	6	T2D_EAS
16	69639771	6	6	urate
16	69818983	9	9	urate
16	69818983	9	9	gout
16	72211652	9	9	BMI
16	72213316	9	9	BMI
16	79894964	4	4	urate
16	79895355	4	4	urate
16	79934255	1	1	urate
16	79934279	1	1	urate
16	87319428	9	9	Height
17	2138016	6	6	Schizophrenia
17	2203167	1	1	Smoking
17	2203175	1	1	Smoking
17	3833563	9	9	T2D_EUR
17	3836363	9	9	T2D_EUR
17	3836887	9	9	T2D_EUR
17	29666539	9	9	T2D_EAS
17	29666588	9	9	T2D_EAS
17	29668808	9	9	T2D_EAS
17	29673219	6	6	T2D_EAS
17	29674854	6	6	T2D_EAS
17	29675673	6	6	T2D_EAS
17	29675744	6	6	T2D_EAS
17	33956625	9	9	Education
17	33956883	9	9	Education
17	33958422	9	9	Education
17	33959531	9	9	Education
17	33961335	9	9	Education
17	33971221	9	9	Education
17	33972567	9	9	Education
17	40530763	1	1	IBD
17	44284057	9	9	Drinking
17	44284057	9	9	Schizophrenia
17	44285531	9	9	Drinking
17	44285531	9	9	Schizophrenia
17	44286128	9	9	Drinking
17	44286128	9	9	Schizophrenia
17	46296204	1	1	BMI
17	50251876	1	1	Smoking
17	50305940	4	4	Smoking
17	50306111	4	4	Smoking
17	56863064	4	4	Cognitive
17	56864422	4	4	Cognitive
17	59444758	1	1	urate
17	61707032	9	9	Height
17	61707032	9	9	BMI
17	69311953	4	4	WHR
17	78627753	9	9	BMI
17	78701430	9	9	BMI
17	78702123	9	9	BMI
17	78702382	9	9	BMI
17	78704240	9	9	BMI
17	78705292	9	9	BMI
17	78706517	9	9	BMI
18	35175765	6	6	Depression
18	39929389	1	1	BMI
18	39929420	1	1	BMI
18	39929493	1	1	BMI
18	51047606	9	9	Education
18	51047606	9	9	Subcortical
18	51047833	9	9	Education
18	51047833	9	9	Subcortical
18	51050914	9	9	Education
18	51050914	9	9	Subcortical
18	51054765	9	9	Education
18	51054765	9	9	Subcortical
18	51055069	9	9	Education
18	51055069	9	9	Subcortical
18	53359473	18	18	Education
18	53403228	4	4	Schizophrenia
18	57687173	4	4	BMI
18	57687573	4	4	BMI
18	57693551	4	4	BMI
18	57693705	4	4	BMI
18	57693822	4	4	BMI
18	57788990	4	4	urate
18	57788990	4	4	T2D_EAS
18	57790052	4	4	urate
18	57790052	4	4	BMI
18	57790052	4	4	T2D_EAS
18	57790225	4	4	BMI
18	57790225	4	4	T2D_EAS
18	57791081	4	4	BMI
18	57791081	4	4	T2D_EAS
18	63331809	1	1	BMI
19	1990309	9	9	BMI
19	4114310	9	9	Height
19	4114310	9	9	BMI
19	4116162	9	9	Height
19	4116162	9	9	BMI
19	4116652	9	9	Height
19	4116652	9	9	BMI
19	4117290	9	9	Height
19	4117290	9	9	BMI
19	4117705	9	9	Height
19	4117705	9	9	BMI
19	5036755	9	9	urate
19	5038715	9	9	Height
19	21649675	4	4	T2D_EAS
19	22234959	4	4	T2D_EAS
19	22235910	4	4	T2D_EAS
19	22236395	4	4	T2D_EAS
19	22236503	4	4	T2D_EAS
19	33966453	9	9	WHR
19	33966641	9	9	WHR
19	33966641	9	9	BMI
19	33966926	9	9	WHR
19	33968418	9	9	WHR
19	33968418	9	9	BMI
19	33968529	9	9	WHR
19	33968529	9	9	BMI
19	33969521	9	9	WHR
19	33969521	9	9	BMI
19	46151303	6	6	T2D_EAS
19	46151528	6	6	T2D_EAS
19	46152114	6	6	T2D_EAS
19	46152277	6	6	T2D_EAS
19	46152297	6	6	T2D_EAS
19	49649051	9	9	BMI
20	6542634	1	1	Height
20	25329309	9	9	BMI
20	25329915	9	9	BMI
20	25374199	9	9	BMI
20	25374674	9	9	BMI
20	25378172	9	9	BMI
20	25378907	9	9	urate
20	25501314	9	9	BMI
20	25506067	9	9	BMI
20	25513536	9	9	urate
20	25528502	9	9	urate
20	25557426	9	9	BMI
20	25560444	9	9	BMI
20	29913930	6	6	Subcortical
20	30016394	6	6	Subcortical
20	32963369	9	9	Height
20	34390527	9	9	Height
20	34394541	9	9	Height
20	42866602	6	6	T2D_EAS
20	42866656	6	6	T2D_EAS
20	42970641	4	4	T2D_EAS
20	42970854	4	4	T2D_EAS
20	42971100	4	4	T2D_EAS
20	42971378	4	4	T2D_EAS
20	42972275	4	4	T2D_EAS
20	43041591	4	4	urate
20	43042364	4	4	urate
20	43042364	4	4	T2D_EUR
20	43044362	4	4	urate
20	48003053	9	9	Cognitive
20	51094151	1	1	BMI
20	51094309	1	1	BMI
20	54871895	7	7	Height
20	54872859	7	7	Height
20	54872931	7	7	Height
20	54873468	7	7	Height
21	22111707	4	4	Schizophrenia
21	42629895	9	9	Education
21	42629895	9	9	BMI
21	42630093	9	9	Education
21	42630093	9	9	BMI
21	42630531	9	9	Education
21	42633065	9	9	Education
21	42633065	9	9	BMI
21	42641913	94	9	Education
21	42641913	94	9	BMI
21	42642699	94	9	Education
21	42642699	94	9	BMI
22	30487619	9	9	T2D_EUR
22	40697581	6	6	BMI
22	42488160	9	9	Schizophrenia
22	42488345	9	9	Schizophrenia
22	42488906	9	9	Schizophrenia
22	42489058	9	9	Schizophrenia
22	42489434	9	9	Cognitive
22	42489434	9	9	Schizophrenia
22	42490292	9	9	Cognitive
22	42490292	9	9	Schizophrenia
22	42490600	9	9	Schizophrenia
*: mapped_PSItype is made up of one (1 to 9 as described in Table S1) or multiple PSItypes
pleitropic variants are highlighted in red

## Sheet: TableS4
Table S4: GTEx expression QTLs of rs186930464 in various tissues*
Gencode Id	Gene Symbol	P-Value	NES	Tissue
ENSG00000134569.9	LRP4	1.5e-17	0.46	Nerve - Tibial
ENSG00000134575.9	ACP2	7.5e-16	-0.42	Esophagus - Mucosa
ENSG00000134569.9	LRP4	1.1e-15	-0.65	Pancreas
ENSG00000165912.15	PACSIN3	3.7e-11	-0.32	Colon - Sigmoid
ENSG00000247675.6	LRP4-AS1	2.5e-10	-0.61	Pancreas
ENSG00000175220.11	ARHGAP1	3.5e-10	-0.21	Muscle - Skeletal
ENSG00000134575.9	ACP2	1.9e-09	-0.27	Skin - Not Sun Exposed (Suprapubic)
ENSG00000175220.11	ARHGAP1	2.3e-09	-0.22	Nerve - Tibial
ENSG00000180210.14	F2	2.6e-09	-0.39	Artery - Tibial
ENSG00000247675.6	LRP4-AS1	4.3e-09	0.35	Nerve - Tibial
ENSG00000134575.9	ACP2	5.8e-09	-0.27	Skin - Sun Exposed (Lower leg)
ENSG00000134575.9	ACP2	2.8e-08	-0.22	Whole Blood
ENSG00000175220.11	ARHGAP1	6.3e-08	-0.26	Esophagus - Muscularis
ENSG00000175213.2	ZNF408	7.5e-08	-0.26	Artery - Tibial
ENSG00000025434.18	NR1H3	1e-07	0.22	Nerve - Tibial
ENSG00000134575.9	ACP2	1.1e-07	-0.18	Muscle - Skeletal
ENSG00000134569.9	LRP4	1.4e-07	-0.29	Thyroid
ENSG00000175220.11	ARHGAP1	2.8e-07	-0.29	Pancreas
ENSG00000134575.9	ACP2	3.5e-07	-0.36	Spleen
ENSG00000175213.2	ZNF408	6.6e-07	-0.27	Artery - Aorta
ENSG00000149179.13	C11orf49	1.4e-06	0.22	Nerve - Tibial
ENSG00000134574.11	DDB2	1.5e-06	0.18	Skin - Sun Exposed (Lower leg)
ENSG00000175220.11	ARHGAP1	1.6e-06	-0.19	Adipose - Subcutaneous
ENSG00000134575.9	ACP2	1.8e-06	-0.19	Thyroid
ENSG00000175220.11	ARHGAP1	5e-06	-0.17	Esophagus - Mucosa
ENSG00000134575.9	ACP2	1.6e-05	-0.25	Pancreas
ENSG00000134575.9	ACP2	2.5e-05	-0.19	Heart - Left Ventricle
ENSG00000134575.9	ACP2	3.4e-05	-0.17	Adipose - Visceral (Omentum)
ENSG00000175213.2	ZNF408	3.5e-05	-0.35	Pituitary
ENSG00000134569.9	LRP4	3.7e-05	-0.44	Liver
ENSG00000175220.11	ARHGAP1	3.8e-05	-0.21	Stomach
ENSG00000175220.11	ARHGAP1	6.9e-05	-0.17	Adipose - Visceral (Omentum)
ENSG00000025434.18	NR1H3	8.1e-05	-0.18	Testis
ENSG00000134575.9	ACP2	9.4e-05	-0.14	Adipose - Subcutaneous
ENSG00000180210.14	F2	0.0001	-0.38	Testis
ENSG00000175213.2	ZNF408	0.00011	-0.2	Adipose - Visceral (Omentum)
ENSG00000243802.2	RP11-390K5.1	0.00014	0.31	Esophagus - Mucosa
ENSG00000172247.3	C1QTNF4	0.00017	0.18	Nerve - Tibial
ENSG00000165917.9	RAPSN	0.00017	0.26	Skin - Not Sun Exposed (Suprapubic)
ENSG00000165916.8	PSMC3	0.00018	-0.11	Colon - Transverse
ENSG00000110514.19	MADD	0.00019	-0.22	Brain - Cerebellum
ENSG00000175213.2	ZNF408	0.0002	-0.16	Esophagus - Muscularis
ENSG00000256897.1	RP11-17G12.2	0.0002	-0.37	Heart - Atrial Appendage
ENSG00000175220.11	ARHGAP1	0.00021	-0.13	Skin - Not Sun Exposed (Suprapubic)
ENSG00000025434.18	NR1H3	0.00023	0.15	Adipose - Subcutaneous
ENSG00000175220.11	ARHGAP1	0.00028	-0.12	Skin - Sun Exposed (Lower leg)
ENSG00000175220.11	ARHGAP1	0.00031	-0.13	Lung
ENSG00000175213.2	ZNF408	0.00034	-0.17	Nerve - Tibial
ENSG00000180210.14	F2	0.00037	-0.28	Esophagus - Muscularis
ENSG00000110514.19	MADD	0.00041	-0.17	Heart - Atrial Appendage
ENSG00000025434.18	NR1H3	0.00047	0.14	Esophagus - Muscularis
ENSG00000165917.9	RAPSN	0.00068	0.2	Skin - Sun Exposed (Lower leg)
*: source: https://gtexportal.org/home/snp/rs186930464; no filtering applied; NES: Normalized Effect Size

## Sheet: TableS5
Table S5: GTEx splicing QTLs of rs186930464 in various tissues*
Gencode Id	Gene Symbol	Phenotype Id	Intron Id	P-Value	NES	Tissue
ENSG00000134574.11	DDB2	chr11:47237712:47237837:clu_7979:ENSG00000134574.11	47237712:47237837:clu_7979	5e-24	-0.65	Nerve - Tibial
ENSG00000134574.11	DDB2	chr11:47237712:47237837:clu_7506:ENSG00000134574.11	47237712:47237837:clu_7506	5.9e-24	-0.49	Skin - Not Sun Exposed (Suprapubic)
ENSG00000134574.11	DDB2	chr11:47237712:47237837:clu_7720:ENSG00000134574.11	47237712:47237837:clu_7720	1.6e-23	-0.56	Skin - Sun Exposed (Lower leg)
ENSG00000025434.18	NR1H3	chr11:47259979:47261241:clu_7989:ENSG00000025434.18	47259979:47261241:clu_7989	3.3e-23	0.75	Nerve - Tibial
ENSG00000025434.18	NR1H3	chr11:47259979:47261241:clu_7604:ENSG00000025434.18	47259979:47261241:clu_7604	2.8e-20	0.79	Breast - Mammary Tissue
ENSG00000025434.18	NR1H3	chr11:47259979:47261241:clu_7604:ENSG00000025434.18	47259979:47261241:clu_7604	2.8e-20	0.79	Breast - Mammary Tissue
ENSG00000025434.18	NR1H3	chr11:47259979:47261241:clu_13599:ENSG00000025434.18	47259979:47261241:clu_13599	2.8e-19	1.1	Testis
ENSG00000025434.18	NR1H3	chr11:47259979:47261241:clu_7444:ENSG00000025434.18	47259979:47261241:clu_7444	6.6e-18	0.72	Adipose - Visceral (Omentum)
ENSG00000134574.11	DDB2	chr11:47237712:47237837:clu_7109:ENSG00000134574.11	47237712:47237837:clu_7109	7.5e-18	-0.47	Artery - Tibial
ENSG00000134574.11	DDB2	chr11:47237712:47237837:clu_7109:ENSG00000134574.11	47237712:47237837:clu_7109	7.5e-18	-0.47	Artery - Tibial
ENSG00000134574.11	DDB2	chr11:47237712:47237837:clu_6622:ENSG00000134574.11	47237712:47237837:clu_6622	8.4e-18	-0.56	Esophagus - Gastroesophageal Junction
ENSG00000025434.18	NR1H3	chr11:47259979:47261241:clu_7692:ENSG00000025434.18	47259979:47261241:clu_7692	1.4e-17	0.62	Adipose - Subcutaneous
ENSG00000149179.13	C11orf49	chr11:47137560:47137645:clu_7170:ENSG00000149179.13	47137560:47137645:clu_7170	3.1e-17	1	Pituitary
ENSG00000110514.19	MADD	chr11:47289493:47289867:clu_6243:ENSG00000110514.19	47289493:47289867:clu_6243	1.4e-16	-0.67	Cells - Cultured fibroblasts
ENSG00000134574.11	DDB2	chr11:47237712:47237837:clu_7436:ENSG00000134574.11	47237712:47237837:clu_7436	1.6e-16	-0.5	Adipose - Visceral (Omentum)
ENSG00000134574.11	DDB2	chr11:47237712:47237837:clu_6815:ENSG00000134574.11	47237712:47237837:clu_6815	3.5e-16	-0.48	Artery - Aorta
ENSG00000134574.11	DDB2	chr11:47237712:47237837:clu_6968:ENSG00000134574.11	47237712:47237837:clu_6968	2.2e-15	-0.45	Esophagus - Muscularis
ENSG00000025434.18	NR1H3	chr11:47259979:47261241:clu_8052:ENSG00000025434.18	47259979:47261241:clu_8052	6e-15	0.56	Thyroid
ENSG00000110514.19	MADD	chr11:47289493:47289867:clu_13608:ENSG00000110514.19	47289493:47289867:clu_13608	1.4e-14	-0.95	Testis
ENSG00000134574.11	DDB2	chr11:47237712:47237837:clu_6697:ENSG00000134574.11	47237712:47237837:clu_6697	1.5e-14	-0.5	Muscle - Skeletal
ENSG00000134574.11	DDB2	chr11:47237712:47237837:clu_6636:ENSG00000134574.11	47237712:47237837:clu_6636	6.7e-14	-0.62	Heart - Atrial Appendage
ENSG00000134574.11	DDB2	chr11:47237712:47237837:clu_8007:ENSG00000134574.11	47237712:47237837:clu_8007	1.9e-13	-0.39	Lung
ENSG00000025434.18	NR1H3	chr11:47259979:47261241:clu_7353:ENSG00000025434.18	47259979:47261241:clu_7353	2.5e-13	0.68	Colon - Transverse
ENSG00000025434.18	NR1H3	chr11:47259979:47261241:clu_7510:ENSG00000025434.18	47259979:47261241:clu_7510	6e-13	0.64	Skin - Not Sun Exposed (Suprapubic)
ENSG00000025434.18	NR1H3	chr11:47259979:47261241:clu_7510:ENSG00000025434.18	47259979:47261241:clu_7510	6e-13	0.64	Skin - Not Sun Exposed (Suprapubic)
ENSG00000025434.18	NR1H3	chr11:47259979:47261241:clu_6641:ENSG00000025434.18	47259979:47261241:clu_6641	1.3e-12	0.76	Heart - Atrial Appendage
ENSG00000134574.11	DDB2	chr11:47237712:47237837:clu_5950:ENSG00000134574.11	47237712:47237837:clu_5950	1.4e-12	-0.44	Whole Blood
ENSG00000134574.11	DDB2	chr11:47237712:47237837:clu_5950:ENSG00000134574.11	47237712:47237837:clu_5950	1.4e-12	-0.44	Whole Blood
ENSG00000134574.11	DDB2	chr11:47237712:47237837:clu_7347:ENSG00000134574.11	47237712:47237837:clu_7347	1.9e-12	-0.46	Colon - Transverse
ENSG00000134574.11	DDB2	chr11:47237712:47237837:clu_7347:ENSG00000134574.11	47237712:47237837:clu_7347	1.9e-12	-0.46	Colon - Transverse
ENSG00000134574.11	DDB2	chr11:47237712:47237837:clu_7686:ENSG00000134574.11	47237712:47237837:clu_7686	2.1e-12	-0.47	Adipose - Subcutaneous
ENSG00000025434.18	NR1H3	chr11:47259979:47261241:clu_6232:ENSG00000025434.18	47259979:47261241:clu_6232	1.6e-11	0.58	Cells - Cultured fibroblasts
ENSG00000134574.11	DDB2	chr11:47237712:47237837:clu_7177:ENSG00000134574.11	47237712:47237837:clu_7177	1.6e-11	-0.79	Pituitary
ENSG00000134574.11	DDB2	chr11:47237712:47237837:clu_7177:ENSG00000134574.11	47237712:47237837:clu_7177	1.6e-11	-0.79	Pituitary
ENSG00000149179.13	C11orf49	chr11:47137497:47137645:clu_7716:ENSG00000149179.13	47137497:47137645:clu_7716	2.8e-11	-0.55	Skin - Sun Exposed (Lower leg)
ENSG00000134574.11	DDB2	chr11:47237712:47237837:clu_6859:ENSG00000134574.11	47237712:47237837:clu_6859	7.2e-11	-0.35	Esophagus - Mucosa
ENSG00000134574.11	DDB2	chr11:47237712:47237837:clu_8045:ENSG00000134574.11	47237712:47237837:clu_8045	1.1e-10	-0.35	Thyroid
ENSG00000110514.19	MADD	chr11:47289493:47289867:clu_6811:ENSG00000110514.19	47289493:47289867:clu_6811	1.8e-10	-0.81	Prostate
ENSG00000134574.11	DDB2	chr11:47237712:47237837:clu_6430:ENSG00000134574.11	47237712:47237837:clu_6430	1.9e-10	-0.58	Spleen
ENSG00000134574.11	DDB2	chr11:47237712:47237837:clu_6759:ENSG00000134574.11	47237712:47237837:clu_6759	3.1e-09	-0.35	Colon - Sigmoid
ENSG00000134574.11	DDB2	chr11:47237712:47237837:clu_5976:ENSG00000134574.11	47237712:47237837:clu_5976	3.8e-09	-0.84	Minor Salivary Gland
ENSG00000025434.18	NR1H3	chr11:47259979:47261241:clu_6432:ENSG00000025434.18	47259979:47261241:clu_6432	5.6e-09	0.75	Spleen
ENSG00000025434.18	NR1H3	chr11:47259979:47261241:clu_6817:ENSG00000025434.18	47259979:47261241:clu_6817	6.6e-09	0.6	Artery - Aorta
ENSG00000134574.11	DDB2	chr11:47237712:47237837:clu_7598:ENSG00000134574.11	47237712:47237837:clu_7598	9e-09	-0.45	Breast - Mammary Tissue
ENSG00000025434.18	NR1H3	chr11:47259979:47261241:clu_8011:ENSG00000025434.18	47259979:47261241:clu_8011	1.4e-08	0.46	Lung
ENSG00000025434.18	NR1H3	chr11:47259979:47261241:clu_6628:ENSG00000025434.18	47259979:47261241:clu_6628	1.8e-08	0.69	Esophagus - Gastroesophageal Junction
ENSG00000025434.18	NR1H3	chr11:47259979:47261241:clu_6802:ENSG00000025434.18	47259979:47261241:clu_6802	2.2e-08	0.63	Prostate
ENSG00000025434.18	NR1H3	chr11:47259979:47261241:clu_6802:ENSG00000025434.18	47259979:47261241:clu_6802	2.2e-08	0.63	Prostate
ENSG00000134574.11	DDB2	chr11:47237712:47237837:clu_6230:ENSG00000134574.11	47237712:47237837:clu_6230	3.4e-08	-0.49	Cells - Cultured fibroblasts
ENSG00000134574.11	DDB2	chr11:47237712:47237837:clu_5929:ENSG00000134574.11	47237712:47237837:clu_5929	4.5e-08	-0.48	Heart - Left Ventricle
ENSG00000110514.19	MADD	chr11:47289493:47289867:clu_6647:ENSG00000110514.19	47289493:47289867:clu_6647	4.8e-08	-0.48	Heart - Atrial Appendage
ENSG00000134574.11	DDB2	chr11:47237712:47237837:clu_6795:ENSG00000134574.11	47237712:47237837:clu_6795	4.9e-08	-0.52	Prostate
ENSG00000110514.19	MADD	chr11:47289493:47289867:clu_6007:ENSG00000110514.19	47289493:47289867:clu_6007	9e-08	-0.81	Ovary
ENSG00000025434.18	NR1H3	chr11:47259979:47261241:clu_6838:ENSG00000025434.18	47259979:47261241:clu_6838	1.4e-07	0.58	Stomach
ENSG00000180210.14	F2	chr11:46728837:46739048:clu_5013:ENSG00000180210.14	46728837:46739048:clu_5013	2.1e-07	0.63	Liver
ENSG00000134574.11	DDB2	chr11:47237712:47237837:clu_5993:ENSG00000134574.11	47237712:47237837:clu_5993	2.2e-07	-0.42	Ovary
ENSG00000134574.11	DDB2	chr11:47237712:47237837:clu_13596:ENSG00000134574.11	47237712:47237837:clu_13596	2.6e-07	-0.51	Testis
ENSG00000110514.19	MADD	chr11:47289493:47289867:clu_4975:ENSG00000110514.19	47289493:47289867:clu_4975	4.8e-07	-0.85	Brain - Spinal cord (cervical c-1)
ENSG00000110514.19	MADD	chr11:47289493:47289867:clu_4975:ENSG00000110514.19	47289493:47289867:clu_4975	4.8e-07	-0.85	Brain - Spinal cord (cervical c-1)
ENSG00000025434.18	NR1H3	chr11:47259979:47261241:clu_7111:ENSG00000025434.18	47259979:47261241:clu_7111	4.9e-07	0.32	Artery - Tibial
ENSG00000134574.11	DDB2	chr11:47237712:47237837:clu_6025:ENSG00000134574.11	47237712:47237837:clu_6025	7.5e-07	-0.38	Pancreas
ENSG00000134575.9	ACP2	chr11:47244951:47245305:clu_6438:ENSG00000134575.9	47244951:47245305:clu_6438	9.6e-07	0.73	Spleen
ENSG00000025434.18	NR1H3	chr11:47259979:47261241:clu_6766:ENSG00000025434.18	47259979:47261241:clu_6766	1.2e-06	0.52	Colon - Sigmoid
ENSG00000134574.11	DDB2	chr11:47237712:47237837:clu_6832:ENSG00000134574.11	47237712:47237837:clu_6832	1.3e-06	-0.38	Stomach
ENSG00000134574.11	DDB2	chr11:47237712:47237837:clu_6000:ENSG00000134574.11	47237712:47237837:clu_6000	1.4e-06	-0.67	Brain - Cerebellar Hemisphere
ENSG00000134574.11	DDB2	chr11:47237712:47237837:clu_5916:ENSG00000134574.11	47237712:47237837:clu_5916	1.5e-06	-0.66	Brain - Cortex
ENSG00000134574.11	DDB2	chr11:47237712:47237837:clu_5990:ENSG00000134574.11	47237712:47237837:clu_5990	2.3e-06	-0.36	Adrenal Gland
ENSG00000134574.11	DDB2	chr11:47237712:47237837:clu_6325:ENSG00000134574.11	47237712:47237837:clu_6325	2.8e-06	-0.38	Artery - Coronary
ENSG00000134574.11	DDB2	chr11:47237712:47237837:clu_5033:ENSG00000134574.11	47237712:47237837:clu_5033	4.8e-06	-0.46	Liver
ENSG00000134574.11	DDB2	chr11:47237712:47237837:clu_6622:ENSG00000134574.11	47237712:47237837:clu_6622	4.8e-06	-0.49	Small Intestine - Terminal Ileum
ENSG00000175216.14	CKAP5	chr11:46751534:46753310:clu_7695:ENSG00000175216.14	46751534:46753310:clu_7695	6.8e-06	0.31	Skin - Sun Exposed (Lower leg)
*: source: https://gtexportal.org/home/snp/rs186930464; no filter applied; NES: Normalized Effect Size
